# Supplementary material
Source: HighWire-hosted journal article supplement (https://jitc.bmj.com/content/13/4/e010673)
Supplement: inline-supplementary-material-3 [file inline-supplementary-material-3.xlsx]

## Sheet: S1 - peptide list
		5T33		Octamers		Nonamers			5TGM1	octamers		Nonamers
				SVYVYKVL		FAYEGRDYI				STFEFHSI		GGNYGSGSY
				QSIEFSRL		TLNDLIHNI				EAVPKMYK		NMPDILHHL
				TNYRFKNL		SAPENAVRM				GAGEMVNE		TQLIQTHVL
				SGYIYHKL		EQVALVHRL				ISYSFSVL		AVLSFSTRL
				RNFIFSRL		ELLTELHQL				SGHNLEYL		VSVANVDLL
				KILTFDQL		AQNDIEHLF				AYFTHSNL		YTLRNQDTF
				ATRSFPQL		AVLSFSTRL				GQNRIHLE		SQVYNDAHI
				SVVRYVQL		KAIETVHNL				SGYDMPYA		SLHSQVHQI
				SAFSFRTL		KLLGELHNL				QLDVEHNL		TDAAVSFAK
				SSYTFPKM		TQLIQTHVL				SGPPVKNV		NMISVEHHF
				VSPLFQKL		KFLEQVHQL				KNVTFEHV		TQAPAVATT
				RSLKFYSL		ILMEHIHKL				VTTNPVEL		SLLSVSHAL
				RAYLFAHV		NSIRNLDTI				NYAYCQVV		SSPTSTEYI
				QIIPFKTL		FQIVNPHLL				VFTEVANL		STIQNADLI
				RVYYFNHI		KLTGIKHEL				SAMGAAYG		SNFVFARTM
				SALVFTRL		KVLDVLHSL				LTIDNGVF		QSVDMKIGV
				SGYKYVGM		RVYEFLDKL				TGYNFQRV		TQNGILHML
				VIAGFNRL		EIIKDIHNL				EEVAELQG		VSYPHLVLL
				RNLDYARL		KQLEDGRTL				YSGSYNDY		RQLPSSHAL
				VNRVFDKL		IGIENIHYL				VNIVHPKL		GQPADDIFE
				TSPHYQNL		NQNPGVRSL				TILEFAQL		AVVAFVMKM
				RQYIFSKL		DQYKRETIL				SGYKFFSL		SSTTNIDDL
				IITGFRNV		GQVVIIHML				AALIYTSV		RVDQNELVS
				ERPTYTNL		SGLHIIHSL				LQYEFTKL		AQSINITEL
				VQYKFSHL		KILDTFEKL				TITDFINI		SSFQFHNRM
				KVFEYHNV		RLDPYLHSL				VIVRFLTV		RSIKNVTEL
				TSYRFLAL		KTVVNKDVF				IGPYYRKL		QVNQLQHEL
				SSYKFNHL		RNYEYLIRL				VSYLFSHV		AAITNKYQL
				STLIYRNM		QQNNVEHKV				SIVSYNHL		EFSGGGLLL
				VGYRYETL		TQNGILHML				ALYQFSNL		SSPTNTTYV
				SVYTHSYL		SGIRNISFM				VEVTIADA		AGPSGPAGP
				RQYMFSSL		GMLDTHHKL				TNYTFENV		SSAQFLGLL
				KNVLFSHL		VNLKEYPAL				QLEVVHTL		AQLANTTAI
				STFEFHSI		TNPSFDGRL				RAYLFAHV		AQQVQIHQI
				RNFVFHTL		RVAEFTTNL				VGVTYRTL		AQIINSTAL
				VGINYREV		FGPVNHEEL				TQYIFNNM		GANPAYHEL
				RNYSYEKL		VAPFLRQEF				LDHKFDLM		DQQESLHKL
				RNYQFDFL		SMMDVDHQI				TDEQIVQQ		YVHVNRDTL
				RNPQFQKL		TGPSNVDKL				YAMIYRNL		VNQERFPNV
				SMYVPGKL		ASYEFVQRL				INYVVAHV		KQIDVYRSV
				SIYIPRGV		SLIILKQVM				SAMVFSAM		AALINRKEL
				YAMIYRNL		VTYHGFPNL				LLLPLGTG		LASSASAEF
				SSPRFVVV		KQNEQMHAL				THSSRFIP		GKNPTDEYL
				INLNYKDL		EQLHGSHEL				TGPGLLSM		GQLENAEQL
				KNVVYRDL		TRLYPEPSL				AAFVFRKL		SAMENLNEM
				SGYDFSRL		QSIAFISRL				GGYGGFQT		KAIETVHNL
				LVYQFKEM		TNQDFIQRL				ISTPEELG		SLLQTQHAL
				ISARFVQL		VNMEKYPDL				SSYVHSNL		LGIPPDDED
				SGIDFKQL		EQNESAHTL				INIHYTQL		VAVRNLQEI
				VFRELPSL		SSMRGMDTV				QSIEFSRL		IGVVSKEYI
				SNYRFEGL		IVIGVLHQL				ASGVAVSD		FGEEAEEEA
				EIVTFERL		VQPEHIQYL				SDGTVPFW		SSSLNAEAI
				KIITYRNL		SQTPVLREL				SNYSYPQV		QVYTFTERM
				TSVRFTQL		IGPTYYQRL				RSLKFYSL		GGGGSYNDF
				VTPRFPKL		RQGANINEI				ISFEFRSL		IVIGVLHQL
				IPPEYRHL		EQLFQEHRL				PALLQSGL		KESTLHLVL
				SAVIFRTL		KIFEFKETL				SDYVYPSL		SLLNAVHSF
				VNDIFERI		ASIDILHSI				VVFQFQHI		VINELIGNL
				VAYGFRNI		GQIKEYHTL				NAPTFGSL		FAPNSVHYL
				RAFEFKSL		SQLDREHIL				SSYPMASL		IALLSTGSK
				VAPHHLFL		SKLANIDYL				VNYISAVL		VNYEFGIAL
				IAVSFREL		VAYWRQAGL				SGFSFGTV		IGPDVYAKL
				VRYINENL		KELQTLHNL				SGYKFGVL		MTNQKIRID
				RAFEFTYV		KQMEDGHTL				ASYLFRGL		ASMINVEYL
				VTIHYNKL		EELPHIHAF				DEINNPVL		STVVNADQI
				VGPRYTQL		RQLETVREL				DPEDKVIL		IGPKNYEFL
				VNSIFQHL		NVLRQLHEL				IITGFRNV		STITNPSAI
				VGLRYEKI		KIYQWINEL				TNEENPVT		GASLLFLNI
				SFLDVRNI		STVRNADVI				STFQYGPA		SMGVNDIDI
				SFLDVRNL		EQLNINHMI				VGPRYTNL		TSGYGQSSY
				FAYRFSNL		KMLAAIHTF				SAYEYLEL		FSFGNTSTL
				KVLHFYNV		RQLISAHVL				QSPSANVL		KAPDNRETL
				VAFAYKNV		LQLGIPHSF				EQYKFYSV		ISGVNRYYV
				ISYLYNKL		EQSDLVHRI				EGLPEPLT		SHEKSFLVS
				VVFQFQHI		VQLPGLHEF				SVINVSNL		FSITDQQTL
				AAVKFHNL		QLNEQVHSL				LNPLPLAT		ATVTNPTTT
				TAPQYYRL		QLNGLTHTL				QNYNFSNM		SSGINVNAA
				QSLAFHTL		KIVELNTKL				TSHLLRLA		DGMGVSTVT
				AQYKFIYV		HQLPLPHNV				IVYKWVNV		SQGMNVTNM
				RAIAFQHL		AQSFIAHNF				VAYTYDNL		GGFGGGGFG
				IIYNPKNL		TLTNIIHNL				ETIPEEVG		DQVPIQHEL
				TAYRPPAL		TLTNLIHNL				TIVVFNGM		QGPQFVTGV
				SNLKYILV		GLAPQIHDL				TIILFTKV		AVITNAFVI
				KQRLFENL		SQLVKADEM				VNYEPLGL		TLNSFIHVL
				LDHKFDLM		VLSEIMHSF				SSGDFPSL		KSIVNQVFL
				STYSVAKM		RIYGKFLGL				TIIIFHSL		VAPLNLGMI
				TGYNFQRV		EQQPQQHNL				KVYLYTHL		KTIYNVEHL
				LPPPPKLL		DMTHTIHKL				ETLQITQS		TGLPYYTGV
				KNLRYQLL		RAIDSIHQL				AVVDFEAL		SGEELPTTS
				TSVVFNKL		SFYEHIITV				KSITFSKL		FSSTNPTQV
				VIVEFRDL		KTPDLSVQL				GSNFPEHI		ASMTNRELM
				SKYDFPKL		VLNPTDHWL				EDLSSGLG		TATFAQALQ
				VNIVHPKL		RLILEVHQF				VTFDYEEL		EVLTQEHRL
				VGWKYQAV		RVLDQPHSL				RPVIVAYK		VMNSVFRQM
				VGYRQPLV		RLAEVVHEL				SAPEYVFL		KSLITTHHL
				SSYQHTSV		KQLEVVHTL				RVLLFSQM		QGIVPAGLT
				YGYHFPEL		KAPDNRETL				TVVNKDVF		SAPVNFISA
				SNIHYHTL		VGFDYKERL				SSYSPQSL		SSLKNGVVL
				RGPTYVNM		KSVENFVSL				RTFEFKSL		GGNFGGGNY
				SGFVFTRL		YGIRNSLLI				AVAQGNLS		AWEEPSSGN
				KALTYEKL		AIITGFRNV				YSSPSIVL		SSPSNLQII
				SSVYFRSV		IQDVTLHDL				VAHLYSNL		KILDTFEKL
				ISFEFRSL		VSILNRQVL				VVAVFVGV		SALGYLHSI
				TTYKYFAL		DQVPIQHEL				VAVQFADL		AAILGIAGG
				AAYGFRNI		LISDVEHHL				LTYTFSGL		QSLELVHRF
				VAYKFPEL		TQNPDVHWI				TGYQYPTM		SGIIDSDFL
				AVLKYYKV		SLGINPHVL				NTYIYSGM		ASPDASTLE
				VNVRFTGV		STIRLLTSL				TSYFTSGL		ISLKNSQEI
				ISVRFHNL		SINPNNHAW				SSPVYIDL		LEAQAATGF
				VIQDFVKM		TNYRFKNLF				SFLDVRNI		APVHADDLR
				ALVRFVNL		VGYRFVTAI				AILSFTSL		SQEEIIHNI
				SNVKYVML		KGIGNKTEI				STFVYNSM		ALQHSIRLS
				VGVTYRTL		NQMTEAHKL				TYGQPSSY		SQTYNAEYI
				KVLEFERV		VAPDRFPTL				VNIAVTNV		VSPANAAQI
				VNRSFIAL		SLVDLNTRL				TSYIFVSV		ITYGQFAQL
				AAFVFRKL		RAIENIDTL				VVESTGVF		MPNENDKLN
				SGYQPPRL		IQYDRTLLV				NYDAPVGV		FGGSTGGFG
				ASYLFRGL		RIVELFRNL				AVLAPLIA		VAYMNPIAM
				SNVVFKLL		SQNGLVHIW				EIHRELNA		TQPGQGYSQ
				SGLKYVAV		KNYDFAQVL				QVYGFLEV		ELSHVIRQL
				IPPEYRKL		RSIKNVTEL				TTYRFPEL		NDFGNYSGQ
				VRYSHEKL		KQMLVPHGL				SSFVFLNL		AALENTHLL
				TSIAFKNI		LAIRNDEEL				VNAQFPRF		VVYVFSTEM
				RNYLHYSL		SGYEFIHKL				VILSFRSL		FAIQNPTLI
				LGYKYVGM		AGLTHIITM				SVVAYNNL		QQYVFINQM
				QTYDYRNI		AGLTHLITM				TNVTFSKV		KTVVNKDVF
				KNPILWNV		VNVAKLRYM				ALIPPLEE		YGGGGQYFA
				IILKYIGM		HLNAVPHWI				QVVSFPAL		DLHAVKHDL
				TFYNELRV		SQNPTNHLL				VNVRFSTI		RLLQEAHDL
				SGYIPARL		RNVESYTKL				SSPAYPSL		TAIENATVA
				SGYKFFSL		FFSVLLHRV				NLHDVAYK		LLLPGPSVA
				KGFYFAKL		IGVVSKEYI				DVAITELS		SGFNGGFGS
				HVYYFAHL		QLNVVIHQL				YQFVYQNL		QQQQQQHLI
				VGYRTQPM		RTNEQMHQL				SGLKYVNV		GMMLVSHDF
				KDYVFKEL		SALEVAHRL				VGITYQHI		EDNPQTLLF
				TVIIYVRL		KTYQFLNDI				AQFKFTVL		SQLIDTHLL
				RSPKYLEL		GSLSNHTEL				SAIAFSNV		KSLVNKGTL
				SNYLHRVV		ESLRLNHEL				TLTENYAA		DSLATERKI
				KNIRFPLM		VNLREYPSL				KIIEFANI		EELPHIHAF
				LPGRFSHL		TTFSYVNNM				IGFGYPAY		SLILFSTRL
				VGPRYTNL		FSPLNPVRV				SGYDYSYA		KVSDILHSL
				SSLRFTTI		RHPGSFDVV				SGDGYNGF		ASYEFVQRL
				VQYVLPRL		VGFTFPNRL				MDVAASEF		TSFGTEASN
				GVLRFVNL		VSVEYTEKM				QTYDYRNI		KNHEFIATF
				STIVYYKL		VMVHDPHSL				IQVSNVLS		SGLLNQQSL
				VADKFSEL		AAITNKYQL				TDTTILQV		SGPTNASAF
				SAARFALL		AQLEKAHQL				SSLEFSQI		NTHENLTYL
				STRLFAVL		QQQQQLHSL				DSAGHILY		SSLEAEHRL
				VIWKYPTM		AAVIAHDFL				ILIVYENL		SAPQSAVEL
				SRFQPLNL		VSYRNIEEL				VAPRYHLL		FSVEGQENL
				SGVDYRGV		TSVENHEFL				RSPKFSSL		TAPVNIAVI
				VNVRFSTI		VITNFSARI				AVLGTVTF		SSVQNGIML
				VSIRFYEL		SAPYGRITL				GILTFSNL		FSPFNPTSL
				SGLTYIKI		EQLEVHHSL				STGGYNQP		EQNHLLHLV
				AQYRFIYM		KIQSFINRM				TDTLINYM		ATFEFTANV
				TDKPLRLP		LLNPHLRQL				VTPRFPKL		AAVIAHDFL
				RNQVYTQL		IYIPRGVNV				VNQKFNNL		ESLKQLHGF
				STIEFKNM		FAIDDHDYL				TAINFSTV		QLNVVIHQL
				EDVKLLQF		EGLPEIHHL				SVYVYKVL		GAIVNGKVL
				VVAEFGRI		DVINVFHRL				TTYKYEMI		NVEIDPEIQ
				PRPPPKPM		LSPSHYALL				SVISVVSY		DVAYKNALA
				TQYIFNNM		AQLLHVHEI				TSLRFVFL		ELLTELHQL
				GVLKFARL		QQLQIIHRV				VQLPAYLK		NGVINAAFM
				VAYLMQKL		VLLSTIHEL				ATIRVTNL		GGGPGGGNF
				VTWRVTNL		FSEENHEPL				KVITFIDL		TAVVNVTYM
				VNYRHLAL		AQQVQIHQI				SWIAVSAL		QQYSFINQM
				KSYLMNRL		SGLVNHVPL				SGDAAIVD		SLQSIIHKF
				VTVDFSKL		IRYFPTQAL				IWIRVASL		SQYEFENYM
				VSFTYRYL		KSLKNFITI				EDFEVSSF		AAMKNVTEL
				MAPRTLLL		SAYQRGESL				TPSGPPGP		FSGHNLEYL
				VINVFHHL		TQLSSKHEL				ASPIFTHV		ATYTFIQQL
				RQFKYNQL		AQIVNKHLI				ELQTLHNL		YSIVGLSSL
				QGPKYVKI		ASARNLEHL				SGFVFTRL		YAIPNPSFL
				SGPTYIKL		EQMSIGHHI				SAARFALL		DMTHTIHKL
				AYFTHSNL		VGPEHGTEI				VIVKFAQL		AQQNTGHFL
				VGYLHEGL		NQLDGIHLL				AGPGFINV		QEDGPVVIG
				VNNEFEKL		KLIDDVHRL				AQDDSILK		YSLGNTYTL
				TAFRFSEL		QVYTFTERM				SSLYFKNI		SGPTSLFAV
				KTFSYAGF		KTLELPHAF				VAPEYQLV		ELDKIIHEF
				IWIRVASL		RLLEEIHAM				DSAKKVLL		DQARSIHNL
				KNYGFVHI		ESQSVIHNL				VVYIYHSL		NVELDPEIQ
				SQYRFEHL		AALENTHLL				ESVEFQNL		WAVSNREML
				SWLHTSEL		INYDYVHEL				SALVFTRL		SAALNKDFL
				NSPEYQRL		TQAGEIHDL				SVHTFPAL		ANLEVPHEL
				SNTQYARL		VNIDIIHRI				AIIAFKTL		VMNYVEHDL
				VSTKFEHL		SQLQAEHTL				VNTIFTVV		LQIPIPHSL
				VALKFSQI		YMPQNPHII				SSYIYGYV		DQLQPLHTL
				TSPEYQKL		REISEEHNL				GTYDYTQL		VGIENIHVM
				VTYSKPRL		SSFSHYSGL				SIALYSDI		ISPQNMDIL
				VMYRVIQV		KQIDVYRSV				LQYIFAHV		LSPINHNTL
				SHYEFHNI		GVRNPQQHL				INDPFIDL		SAILETHNL
				IQLEFREL		AQQNTGHFL				KVIVFSQD		KTFLFSATM
				SGYFHPLL		NLNSIIHRL				AGPTFNYL		FGGGSSGGF
				QVVQFNRL		RIVENVNVI				YVEDGVYS		TSYRFTTEL
				TTLIFQKL		KQNDVVRVL				VPFPDTYE		SALANYIHL
				AQFEHTIL		VSIEHQELM				IIPTFANL		FALVNGNNI
				AQFEHTLL		SQLELKSLI				KNIRYVAL		QERQQDILR
				KSITFSKL		SALKTIHDL				VSFPTQVL		LAVGGAVLG
				KNVTFEHV		QGPEYIERL				LDVEHNLF		RQQLQAHQL
				RIYQFTAA		DQIQNAQYL				VMYRVIQV		SSLVNKEDV
				VNFEFPEF		TTPEFLTRI				EDGPVVIG		KAPVNTAEL
				SQYLFPKL		ISPTNPTKL				DHSGTLVM		VSSNSALQF
				KVLHFFNV		VSPTNPTKL				SAFEFNEL		STVENFSQL
				STIHFYSL		VNYRHLALL				VSQYYPKL		ELVPHLHNL
				RALNYTHL		KAFDYPSRL				VNDIFERI		RALINSQEL
				FQFTFKHL		VMNYVEHDL				IIYTFPVL		VAVVNKVDI
				QRVEFAAL		DVINVFHHL				PALIYSSA		YALSDLDTL
				VDVEQHTL		TLTNVIHNL				GDNPKLLL		IGLAYVNHL
				SAPRYMDL		KSFEWLSQM				IAYIMPGL		RDEKVQLYR
				QTREHALL		SQTPQLHFL				STFIYNSM		HQTALSHNL
				KTYTFDMV		SNFVFARTM				NDFGNYSG		AALANLDNI
				KSPEYESL		QSVDMKIGV				AQYSFDKL		VSPASYENV
				RTFEFKSL		RVMEYINRL				YSLQFTNL		EQVALVHRL
				KSYSFDEV		EQDKLLHFF				VSPEFHTL		NPDIKYPLR
				VWIQVSRL		IMYDKHIQM				AVLSSGGL		VSPANSTTL
				IVYKWVNV		KNHEFIATF				SAYEVIKL		TQDHVMHLL
				SQFKYALV		VISDFITRL				KVYNYNHL		KTYQFLNDI
				ISSRFQNL		AAMKNVTEL				EEGPPSYY		VIFTSETGM
				STFSFTKV		LSYTRFSLA				NALANPLY		NGPQNIYNL
				IFYYVQKL		SSYTFPKMM				TIIVFHSL		LGVSHSVLK
				TTYVHKGL		VLLELQQHL				AAYGFRNI		DSAKKVLLE
				KDFTFEGF		KTFLFSATM				SSYQFGII		EGEEPTVYS
				RSYDFEFM		VAVTFSERL				SAFSFRTL		AALVNPDSF
				RNPTFMGL		SIYAREALI				TEEGNPLL		SAPASQANL
				VDWLTEKM		AVVAFVMKM				IAYEFVEM		ASIENTSTL
				RGYSFTTT		TQLDVPHVI				LQFQFAEV		AMLTILHEI
				SSLGFERL		GLLEIAHSL				STNLEWLH		SQQQYFHRL
				AVIRFESI		KAYSFKEQI				EIVSFQHL		RAIDSIHQL
				ITYAWTRL		KSVINTTLV				YQYSFPEL		SGPINFTVF
				SSFVLPKL		YQNQEIHNL				TTYKYFAL		AYSSPSIVL
				VNAQFPRF		KSLVNKGTL				SSYKFNHL		QSHLVIHNL
				RVLIFSQM		VNFKHEVSV				DKYTLKLT		VSHSQLHDF
				RVLLFSQM		RQIFNGTFV				FSQEYINL		LAIRNDEEL
				AVLRFESV		GQSSVNHNL				SIVQFYYM		ALNNLLHSL
				SRVTFVNF		SMIRLSESM				FQQEFPSL		ETIIIFHSL
				NAIKYVNL		KQSDVMRFL				MNITYSNL		LPIGQHIYL
				TAYLFSRF		ELVPHLHNL				ANLIYYSL		TEEGNPLLK
				AMYELVRV		KNLVNKEVM				TSTQTMGP		VNFKHEVSV
				VNIRLVEL		VTDLRVTGM				VALQFTGL		GDYADFQYL
				LSPKYIKM		SIFQHIQSA				SVMPYLVA		SAIIDSDNV
				TSFTFRKV		ANLEVPHEL				SNFTFSHL		RVIDFVAQV
				RIFQFQNF		KGVYNKSTI				RNFIFSRL		KILPNYHHL
				YNWRYKNL		AHNAVVHEL				GFEIPDID		ASTTNQQEI
				TNLRYLAL		VNVDHPINL				KNFKFHAL		TSDDVVVVG
				TSVQFMKL		EVLRVTHEL				VSPLFQKL		VNYYFERNM
				EDDVKLAL		KATTNIVEM				VTWRVTNL		AGLNRVKVS
				AGPWYRNL		GQYARALEL				ISYLYNKL		NQSDTSHLL
				INIHYTQL		TLVTIKHEL				SSFAFAGL		TGEVAGSGF
				VQYLYRVF		SGLAHLHSL				ATYTFSGL		HPLGADSQV
				TIYKFQGM		SSLVNKEDV				QALKYFNL		LVRPGTALE
				SGLKYVNV		FQIPVQHYL				QALVFSNL		MKTSRAFFS
				KIIEFANI		KVVSVLHHL				SSYAYTKV		ESNIQPIFA
				KNLNYLHL		EAQDLIHQL				EGAQYLMQ		GAIGNPEVL
				SGVEYTRL		GGIQNVGHI				VSPVYSAV		AQLKTMHNL
				TGPSHPFL		AIFKKTVAM				VVYPFPTF		AQVQLLHQL
				KTFMYNEL		AMAPRTLLL				VFYQVQSL		EFIEVFHEL
				VIVKFAQL		FSGANKEKL				SNYLHRVV		YGNVNVATL
				TSFMFQRV		VMNSVFRQM				SSVRFSYM		ASPEGQDYL
				IVHAFVSL		IATKNPEEI				AALDFKNV		SAPSADAPM
				ISLEFRNL		AALKLGQEL				SSILYPLL		ASLVNADKL
				TALAFRTL		SELQVLHDI				SSVQVYNL		VSVEYTEKM
				VITKFDHL		RALSNLESI				SVFQFGSS		AGNKNFHNF
				TRLKQIGA		SLQSIIHKF				SVPVMTQP		KALQFLEQV
				SSLRYLQV		VGLANLHAM				KSIDFPLT		EIHKDLLVT
				TSVRFDSV		LSPINHNTL				ASPEYSNL		ISPVNPVAI
				VQYDHHYL		RLLQEAHDL				KIITYRNL		QQLDVEHNL
				FSPRFVAL		ELDKIIHEF				EDFDIHEL		ALSGAGALG
				VIHIFSHI		IGPDFQKGL				SSLLFVKL		VLTHIDHSL
				SGLNYKKL		IILKNFEKL				SSFSYLNL		LAPANTYTV
				ADFELHNF		VAAANREVL				ITTEVVNE		IVGINLTEM
				SMVRMQQL		KSYSFIARM				SSIIFEDI		DSLEEIHAL
				KSRIFQNL		GANVNHTTV				SLLPSSNL		AAPSSPTTM
				EDYPHVYL		KSIVNQVFL				SYSQPPYN		VILEYFTRL
				MSYLFRNI		SQLNELHHL				KNLYRQLI		SVTVQKEYS
				VSPRLTFL		TTLERTEGL				SSFEYGQV		SMVQNRVFL
				VVHRFESL		RQQLQAHQL				VSVVFVNL		AQHPGQHLI
				ALYHFSSL		RHIQNMTEI				VALAFRHL		ASLSNLHSL
				AALQYRGL		GMKLNLDYL				IAVQFVDM		SSPVNPVVF
				VTWKYTAL		TSIKNQTQL				VNLQYSEV		HSVQNTEYF
				SAPIYKRI		ETLTEPHQL				VDYEYSEL		SSLINGSFL
				SRVSIRIL		FSKKNFESL				GVGDDQIG		GSPENEEYI
				SRVSLRLL		ELNSNFRQI				VSIQFYHL		AQSFSGDFT
				DDTEFVRF		VALKVIHEL				QPFNVLYE		VAVENTTSL
				KNFVYRTL		VFLERGEVM				SSLGFERL		SGVSNPHVI
				IGPRYSSV		ETIMNQEKL				VALNFQTL		VNMEKYPDL
				LAPHFNSL		VGLINKDSV				AWLQVSPV		SGIGVSQVL
				TGFVFQKV		SLPTNLIHL				PEDKVILA		SQLLNLTQL
				AQQSYKSL		AVNMHFHDI				NTYKYAKI		NLNGTLHEL
				SVILMQHL		KSTVNKWTL				FVQDLTDE		DVINVFHRL
				AAPHFFHL		EDLHLGTSF				IAYQFLRA		GSIVNEGYL
				KGLRFIQL		SLLQTQHAL				AGYMYTQL		VGFDYKERL
				YTYLYVRM		VGLYYINKI				KNVLFSHL		QALELAHVL
				TSPLFLHF		SMDELNHDF				PDDVIALD		NQGTNVETI
				IGYAFVHL		AAIVDGDRI				LTSEPQPQ		VAPQNTTAL
				VINVFHRL		AMLTILHEI				QAYDFYYL		YGGGPGYSS
				SATVFRTV		TRKTPQGPP				LQAGNVVL		SVLNVLHSL
				VKYLFTGL		SIYEKLIQF				IAPSYAGI		TQIQNAQLM
				QAPHFSRL		VMLENYSHL				RAPQFINL		MSIENQEEL
				QAPGYSKV		SLNPIYRQV				TNVQYSNL		SFGGGSFGG
				QQYLFDRL		QATPLLHAL				KSYLFQLL		AGIENDEAF
				MAYLFRNI		STLRNIQGL				VAPHHLFL		IQQVVNHGL
				ANLKYLSL		GQIQNKEVL				SSIVFAEL		LNMNSAPTF
				TAFKFKAL		TALEHQEYI				INNIIVGG		IGPTYYQRL
				SAFEHTQM		IQQSIERLL				TSTPTVSS		ASLDNREEL
				EDFDIHEL		DQLIEGHQW				SSGINVNA		ALNPTQREV
				SSHSFVNV		TANPQTHSF				QSDLVHRI		SAIGYIHSL
				RIQEFIEL		LQNPITHSL				TGSESPIV		AQLEKAHQL
				VWYRVIQI		SLLEHSREF				STVEFTNL		KQMLVPHGL
				VWYRVLQI		TLNSFIHVL				HIYSFSSL		TGVTNRDLI
				TSLKYLEM		VNWEKHVLI				AVYTYLRL		SQLVKADEM
				NTYKYAKI		VVYIYKEHF				TFFTPGNL		SAATNPNAM
				VITKFILV		KAVDFDGRL				EIITFTAM		SGLLNSQAL
				STRVYASM		NTYNYKSTF				ISPDYRNM		ISGVNGTHI
				TSLKLENL		LLNSEVHML				IIYNPKNL		GVLVELEQA
				VTVVFERM		KLLAVIHEL				PYTEFPEF		TSFVNFTDI
				EDYIQDKF		RILPSIHQL				TTLIFQKL		AGIYNTTEL
				SSIRQPSL		RAQDVPHSL				AQQMYQSL		QQLQIIHRV
				IYFKVTHV		VGPTLKATF				VIAELVNV		SLYDAFPKV
				SAYRFSGV		IIQSIRMGM				RSYDFEFM		AMLAVLHTV
				TNMTYEKM		DLHAVKHDL				GSDSVILG		VSLGKLVLT
				FTFEYRYL		AVVEFSRNV				VADKFTEL		VNYDYSTLI
				EDYQFRTV		AIVERAAQL				INTAYTNV		YAIVGLETI
				EDVRLIGL		SQEEIIHNI				VHLDIQVG		GAVQNIAHL
				LTGIKHEL		ATYTFIQQL				ANINFPNL		AAPISTTEL
				VALLFRQL		SMDPYPHQF				IVPLFTNL		RQLAKIHAI
				QGQIYVHL		AALQNLVKI				AIMFVGVN		TGYGTQSAP
				SGLIFNKV		ILHTNLVYL				TIYRFLKL		EQDKLLHFF
				HNYDYKEL		AKLVNQEVL				SVAGVLTN		YGLKNLTAL
				KIVPFFKL		SIAAFIQRL				VSYKYSKV		TLTNLIHNL
				RSISFSNM		EGLTTKHHL				SGYGSHGY		KVISTAHSL
				TALRYYEL		KAFEYPSRL				QVVQFNRL		TSVENHEFL
				MSFQFAHL		ESYSFEARM				VAFAFKKL		PEAEQGGAE
				DQYDRVKI		KAPEYLHRF				RDYVFIEF		KLIDDVHRL
				TEEPKNIP		WVLVNEKPL				KSLEYHHL		AQLSTIRSF
				AVYIHALL		TNYRFPSSL				SSIERMGP		SNQSSYGGP
				VNYDVRVF		TSLIILHQL				EDYNLYTF		SSNLELHSL
				AWVKIENL		VVMNVIHQL				LAPAYALL		IQLMNTAHL
				VAPLYKRL		EMTEALHDL				RTYTYEKL		MAPQNLSTF
				IVLTFRQL		QLQEELHQL				EDFYYTEM		EAIQNSTSI
				SSFKLGNL		ELSDIAHRI				IIKDIHNL		FSNVNLKEV
				KLTGIKHE		YSIQGQHTI				AIVSFAHV		GVRNPQQHL
				LQYTFHDV		TALQVFHNL				SGPRTLVL		AALNNHVEV
				KNINFYNV		EMMDVKHFI				VNYRHLAL		KQDACVHDL
				EDYIHIRI		VTIILKEPV				SSPPYLIL		SGLLNMTKI
				VTHTFHQL		SNYQHITNF				SEEQFGGD		IVAAGVGEF
				VRYIHVEL		AQPVNVQQL				ERPTYTNL		LNYAYTAQL
				QNLKYLGL		VSFIRTIQM				VVVMFTAL		SSLHPMGGL
				VAPRYHLL		SGTERVSLM				SMYVPGKL		VVVENGELI
				SSYLHSLL		VIAELRENL				TAYAFHFL		QQQQQQHLL
				VSISFKSL		HQITVLHVY				HIYEFPQL		AAPTSAAAL
				VAFAFKKL		RVIDFVAQV				SITSFIPR		EQLHGSHEL
				EIIKDIHN		ESLKQLHGF				AQYQFSVL		RVAEFTTNL
				SSLLFVKL		VIVRFLTVM				SRYLHAHL		GGGYGGGSF
				ISDVEHHL		VIVPHIVNL				VGPVYPIL		NAIANASTL
				SSVDLRSL		ANYQRDGPM				SILQYSNV		SQMGNLHAF
				FVYTYKLV		AAIENIEHL				AAYEFTTL		RIIENLHDV
				AIHTFRQV		FVIRNIVEA				ANVVFTQL		IQIANVTTL
				ATIRVTNL		KVISTAHSL				IRTLYLTL		SSANNPNLM
				AIIAFKTL		ASIVNKDGL				SISVQVNS		SNFGGGGSY
				KTFTFDTV		SLNPTWRSL				GSYSYTQV		SVLEVSHVF
				RDFSYNYF		SMVQNRVFL				TNSASSTL		AGLPESVIW
				LVYKFMNL		VNVERVLNV				KVIEFKKL		EMLKLGHEL
				INLEFVKV		VQPTHVIHL				LGYKYVGM		IAYKFGKTV
				AVLRYTKL		FQNNAIHYL				ATFEYSFI		LAYENVKEV
				EDDLKSLF		SQKENLNFL				SSMAYPNL		DANPETHAF
				ATAVYRKL		KVLRFIAEV				ESPLFNNV		FFSVLLHRV
				NVIVFGRL		EDFEHKYNF				TAPEYVFL		YGIRNSLLI
				FIRNQEQM		WAFKNPDTI				KVLHFYNV		DPEDKVILA
				VQRSFSQV		SSNLELHSL				VITKFDHL		ASFSNGPVL
				VIASFKVL		EQDIVLHGL				SALRFQAM		QSNDTFHSF
				STYLFRLM		QLLQALHHF				GFGGNDNF		QSLTVIHDF
				TNQEYARM		FSHPTIHNL				AQFNFQNV		RAQDVPHSL
				ASVKFHVL		AWYQKQELL				VELAAGPF		SKLANIDYL
				KTVRFNVL		SLLPLPHHF				HVYYFAHL		FYPADITLT
				ATLAYKKL		AQHQQVRQI				VQYKFSHL		AALQNLEQL
				KQYPYNNL		LGPQRVSGL				DAYEPEIS		FMATNPEHL
				YGVLFRNL		VQTHFIHTL				AGVKFTGL		SQSQSLHQL
				TTAHFPYM		GSLANHTSI				GVLPNIQA		SQLPQPHRV
				VSFDYHQM		RLLEASHAF				LMAPQPGV		NQMTEAHKL
				DSPIIEKM		GQLAEHEGI				SSWGGYVF		VQVPNLESL
				QSYLVRTL		SSIEHLTTL				VWLEAARL		GSIEGRHDL
				NSLTYRLL		EVIETLHKL				VSGIFPGL		SPEGSYVGQ
				AGYDYKVL		SNVKHVINF				GVYVFGEL		GYGNQGGGY
				SAPRYMAL		SQLVHGIHL				IDKAVAFQ		LSLPNTDYI
				TGPGFVRV		RLNQQAHQL				ANYDFYQL		YVTGPGGVD
				AQYIRYTP		RMNYIHRDL				SSFYPELG		SGPLEYPQL
				TSVPFDHL		GAADIDHKL				IWTIATNL		ASVSNPLFL
				IWLHVEGV		VGIENIHVM				TNISFTNM		VVYIYKEHF
				VQFLYREL		QQIDYARQL				YSYSFFHL		AAIQNLSEA
				DDTQFVRF		ISPERAAQV				RGPTYVNM		NQNPGVRSL
				AGYRHISL		INQIYEARV				ASSAMVFS		ELLYMAHDL
				KSYDLPHL		SQIKNEINI				YSSPSVVL		HQAQIDHYL
				RDYVFIEF		TQGQNIQHL				KNVVYRDL		IAVANATTM
				QSDLVHRI		EVSFVIHNL				MAYMASKE		ALKPGAAVT
				VNIEHRDL		NLNGTLHEL				QNYEMPNL		SSEINSAYL
				TDFEFKEL		QLLSHLHTL				SGPVLPSL		VVMNVIHQL
				SVVSFDKV		YAITTLHNL				SNMTYEKL		AIITGFRNV
				ISYAWKEL		ANLKFMTSM				QVTQPTVG		EDFEHKYNF
				AGYSFEKL		AQIKEMVEL				EDVKLLGM		VQHPLLHYL
				KAFHFPSL		QQQQEYHEL				YTNGSFGS		LPSPQHILG
				SVVRVTSL		ASMTNRELM				VWIQVSRL		KIVELNTKL
				SSIYFKSL		SAPWYLNRV				LLGELHNL		VCVDNSEYM
				VALEFTHL		LSAKNKDYM				RIYQFTAA		GGYGGGYGS
				AVYSYKRL		FSFGSKNTL				DAAGVASL		AAVVNFEEA
				VFRLLPQL		DMLRMYHAL				SNFHFAVL		RILPSIHQL
				TITKFLQL		KNWQFVENL				HDFRSPPP		KRGIVGYDV
				YAYLYIRM		KTLNYTARF				NSQTRIIE		GGNINVETI
				EDYKLHFI		GLSAVEHRL				LASGTTLF		RSIQNAQFL
				SHFSPRNL		AVSTFVNRM				SEEQNLVT		VQLENQMVL
				VWTHARHL		TQYIFTEKL				IGLDYSSL		SNYHFYSSI
				YTFVYRVL		SQAVNKQQI				VVYSYHYL		AQLQNQQSF
				STQKYPKL		EQDGILHTL				YVLVYYNL		SSPEGVETM
				TALRFLEL		FSVENKWRL				ASPEFTKL		DLNHQAHNL
				SVNIFRTL		EDYKFHHTF				TSPEFQEM		FSPTNPAHL
				SVNLFRTL		IIWVKTNQL				VSYVFTEV		TQVIEPHDI
				VGFNVKNV		FSLHNPYNL				INVELSLL		GQIKEYHTL
				AILKFQGL		LVYKNFPQL				LVPHQMAH		KLLGELHNL
				MVHDPHSL		SQSSVFHGF				QGYEYDNL		KVVSVLHHL
				KTPLYSQL		NSMVLFDHV				IAFIFNNL		VMLENYSHL
				DDVRILEV		SQNPNVRWY				VAYVFQAL		SGLVNHVPL
				SGYQYKRL		QQAPHPREI				VSFSYAGL		WVLQTDSQQ
				SSYAYTKV		ASLSNLHSL				TGTGAVSF		EQLFQEHRL
				TSMAFKNI		SALVKEEYL				YGYHFPEL		SALTNHQRI
				KTLILPRL		EVLTQEHRL				AVYTFETL		GFGGGGFGG
				AAYYFKTL		SQDGVQHLL				TQYTFSSI		SMDPYPHQF
				IGPYYRKL		VWITRAPGM				SIASFVTL		KTLELPHAF
				INKKFPNI		SQDENYHHL				ASQPYSSL		QQPSNYGPM
				IALRYVAL		SIFEHKIVF				SALRFLNL		AAMLLQQVM
				ISDIHTKL		AGPENSSKI				ASYEVAHL		VALDFEQEM
				EDFLKDYI		VNMVPFPRL				SGLVFVQV		GQVTFLHVF
				LMYIHSQL		VTVLNVDHL				IEDGVVVG		TNQDFIQRL
				KQYEAARL		SVNSITHKL				TSPHYQNL		VNVAKLRYM
				ASLRYLGL		VIWGKYAQV				VSYIFTYA		RLAEVVHEL
				VLAVLPRL		KQMELYHSL				TSLKLENL		DPDEKYLLR
				SNYLYREV		SGYDFENRL				ITYTYDLM		TGPSNVDKL
				SYEFVQRL		QLQKMVHDI				VAVVNVHS		GQMGTVHRI
				APENAVRM		RLLPHMHNI				VGGPFPQL		NAAGFNKLG
				SGVEFREM		ISPKHFVHL				LIGVDHSL		YEPEISRLH
				KTYHYLYL		ALLRDVHNL				SSYGGPAS		SSPSNPAAL
				VDTDHQLL		VGLYLREHI				NNYVYAGL		ATFEKESVM
				TSLKYMLL		VQIKNDVFI				KILTFDQL		FGLSNQLVV
				NTPKYAKL		TQNVNQAKM				ISLDYQHL		ALLHLVHDF
				QQIAFKNL		GVHVNQELL				AVYSFEAL		SIAAFIQRL
				VLYQFRGV		TQDQHLHNF				EDLLLQDF		SSLENATSL
				VAFKHLFL		SSPVFKAMF				SSYTFPKM		VAHTFVIGV
				GNYEYRLI		WKVVNPYYL				AVLRYTKL		GVQQDTILA
				AVFAFRAV		SNYNFEKPF				QGLPEPLT		AAMLNYTHI
				SSMAFKQM		NSMVLFDHM				SGYDFSRL		TDEVVDYIS
				AAVVYHKL		KAPVNTAEL				ASYPFTTL		ISPTNPTKL
				KNPGYIKL		AQYRLVTEI				SSITFVNV		AQLSPTHQI
				KVIEFKKL		RAFEFKSLL				SGYKYVGM		IIEPSLRQL
				RSVLYKSL		ASVQNEAKL				VNYPFIDM		GGIQNVGHI
				VVFFFTRL		ALNPTQREV				RVLIFSQM		GMIENGPFL
				KIYDGPRL		QLTQVIREL				TNLVYPAL		ALSEISHAL
				AIYRLPTL		VSYEKFSNL				IIITFNDL		SAPTAAAVV
				KNIFYKAI		TTHSNHEVL				SGFEFTSV		YMPQNPHII
				FNYKGKNV		TINKEDHTL				VNVRFTGV		SNYAFLYGV
				IQWAFKNL		RQLEHYLGL				SYSFIARM		QLLTVKHEL
				SNLYYKYL		IQFSFKEKL				SGYYFTTL		IIQSIRMGM
				VGLKFPGL		FSNVNLKEV				YGGGGQYF		TSNMNSSYI
				KTFHFAGV		KALQLLHDI				AVLRFESV		NQLDGIHLL
				QNLKYLHV		AQHGRFLEI				TAYRPPAL		VIVRFLTVM
				IGPRFKLL		ALNNLLHSL				SFSSFYNV		ERIEPSPYK
				ADFEIGHF		VIMKLFPQL				FTTSATDY		SQMTNLQEL
				VALAFRHL		IHISKKWGF				TLVTEAVQ		EQDGILHTL
				SAYEVIKL		AALVSRTFL				MQVVPQET		KANDLTHSL
				TDEESRVF		ATFYFQNTF				LNYTYSQL		RQQPIWHTL
				INTAYARL		EMLHELHRL				FGGGGGNF		YGIVNENSL
				ATFHFRTL		NGPEFEARI				SDQDYILK		FSLVNGDDM
				KSLSFPKL		QLLTVKHEL				VVPEYVTL		VELLGELEE
				SAIHAVNL		VNYYFERNM				ISFKFDHL		PAWDPMGAL
				AVIKFLEL		GSIEGRHDL				IIYPPPEV		VVAPLNIVL
				VDTDLQHL		SQLPQPHRV				TEYVFTHL		QQIDYARQL
				EVYLFERI		SAIHNSTKV				ATFLYAEV		NAQHDPLLT
				KAFWYGQL		DIMKTYHYL				IDYEFSAL		ILMEHIHKL
				ENFTFQKV		ELSHVIRQL				SISASSGL		AAGVGDMVM
				EDFLVHEV		GSVANKFYV				SFGGGSFG		SQPVNPHSL
				QLAEYHKL		KNFKFLGTL				ANYNFRGM		SGIRNISFM
				KQFAFVHM		KILPNYHHL				SEGRFTFT		VSPTGGEVI
				SALRFQAM		YGINNIREL				VAYGFRNI		AGQFNQDYL
				AVIHFAGL		EVISTLHYF				SYPSASVE		YAPDSIYYL
				SNLKYSLL		QLNAMAHQI				YSGSPTSY		KQMEDGHTL
				EDFLHESL		QQINEMHLL				TSPEYQKL		GSVVNSVAL
				SRYLHAHL		DQNTATHLI				IALRYVAL		HLNAVPHWI
				NTYRFLTF		VQPINQHVL				SGFSYPNF		FSPLNPVRV
				QSFFFTHL		VGYNPYSHL				AFDMEDLG		SGVGNYISA
				EALKYLNV		QAIKNGQAL				VVALGAEY		EILDISHNL
				EMYQVSRL		VNSNFYLRM				ATGPYPSM		KELGLETYK
				IWTYMPHV		SSVENIQRV				ATMLFAEL		KVLDVLHSL
				KVLIFSQM		VSNLNRQFL				SSYQHTSV		AMLTNLESL
				IFYFVNKL		VNVRFSTIV				VSPVYSYL		INYDYVHEL
				KSFLFSAL		MMHSNMETL				IAPAFSSM		KLTGIKHEL
				KSYLMNKL		YIHINIGAL				AAYSFYNV		ASHLNLDAL
				VFREVETL		SGFYYKTRI				TNYKFFML		KELGIETYK
				TIAKFHFL		VAVRNLQEI				TADVGFID		QLLQALHHF
				VTVNFRKL		FNVDRHVGM				APAPPTVS		KQNDVVRVL
				TSAHFARL		AMIELVERL				DTEFVRFD		QAIKNGQAL
				VFVRVIQL		SSPVNVKKL				KILVFVAV		KEPFEDGFA
				AVFRFKVL		QQASDVHEL				TSMYFSAV		QNPTNAEVL
				QVALVHRL		RQILNADAM				VNFVHTNL		SALEVAHRL
				EDAQILKV		TQNPQNHLL				SQYLFPKL		KQLEVVHTL
				EDTSIHRL		GQAAVWHRL				IAVSFREL		SSSTNVDLL
				TPAVRTVP		ESLKQVHFL				ETPVYANL		FALVFTTRY
				VNIPFVRL		VNKEFTVNI				KSIAKFFD		STYGWTANM
				YNFDFSKL		SSLKNGVVL				QVALVHRL		GTFQRSAGL
				AQQAYKYL		SQYEFENYM				EPTYVKVK		RLNQQAHQL
				IFMRVATM		FLVQNIHTL				AVYAFLGL		DLLEQQHQL
				GLAVKDLK		SLITNKVVM				VGPKFRGV		SALAFGQGL
				VGYRFVTA		FTWTGAEHI				RIYGFTAV		QATPLLHAL
				AHIKLSNL		SAYLYKQGF				ATYIFNGL		TSPVNPAVF
				KALEYLKL		GAVTNVKVI				YTGGFTNV		AKDVKFGAD
				VQQYYRKL		AAPGSKDHL				VLDVLHSL		QLNGLTHTL
				VNLTFRTV		FGGSNVHVI				HTAVVPLD		LSSSLKRFD
				EDSLNHLL		KSVANLEYL				IAYGYNNI		TEFGTYAGA
				STFSHHSM		FSNKNLEEL				AIETVHNL		GQVVIIHML
				EDHIFQKF		SITKFLNRI				VNIEFKDL		TLTNVIHNL
				VQQYYRVL		VNVERYKQI				RNQVYTQL		IGYPFLVSV
				VTQKFKYL		RQLPSSHAL				SNFNFALV		SSGINGSFL
				AFYYIHNL		QSPGFYRNV				VRNPQQHL		LNVPASVRF
				AYQHLFYL		VSYWFDQRF				TEDYDMFE		AQVQNSEQL
				IIKDIHNL		FVRINQDYI				GNYSFYVL		YSGIPAVSF
				SNIQHVQL		ALNDEIRQL				AVVELVTV		KIFEFKETL
				EDSILHQL		YTLRNQDTF				AAYSFYNI		SGFDDPGIF
				QDHVMHLL		DLMHHIHML				EDFLYSGF		SAPTLAETM
				IHYFFSKL		IQLEANHVI				GVLRFVNL		STYDFMSTL
				SSVRFSYM		SAPRFLTAF				SQYRFEHL		NYGGGGGGY
				TLDKLDVK		RVISFEEQV				YGGGNYGS		YQPYNKDWI
				YVHLFPKL		SSLGKTELF				TSVRFTQL		LTEAPLNPK
				AQLIYRHL		VNVVFIGHV				VFRLLPQL		YTVANKEYV
				TSLKYSKI		SSPSNKFFF				VLYVWAQL		VSILNRQVL
				VAMVFKTL		VAYKFPELL				VSTKFEHL		YGGYGGYGA
				LNKTYHDL		KNLDWFPRM				AVLNFTAL		GLMTTVHAI
				HTYVHATL		SNIQYITRF				SVVAFHNL		NYDSMKDFE
				SSPPFQQL		SSLLNIQHF				VIVEFRDL		SSVLNLTEL
				VYFEHKSL		ILWEHLEQM				MITDVQLA		QQVQAAHSL
				SVIKYELL		RGPEYLTQM				SSLEFTEL		TLNDLIHNI
				FDYDHDAF		VLNEYFHNV				TTVAFTQV		AGFAFLTGV
				RTPVFSFL		LANNVLHEL				SSLLYPLI		QLNEQVHSL
				KSIAFQNV		AQLSPTHQI				KSFIYPSL		GQSSVNHNL
				SSLEFKNS		VALVVGHEL				SGYDFGYM		ASIVNKDGL
				TNWSDVGK		INIEMYQRL				RAIAFQHL		SAVKNDYEM
				SFIKAIGV		TAFDFTSRV				VAPEFRRL		SGGYGGGYG
				VHYTFNKV		YIIVVEHDL				TAFKFKAL		TTVTNPEPM
				SNTMYARL		GQMGTVHRI				ASYEFTTL		LSPSHYALL
				EDNLLRQL		HQAQIDHYL				AFYTVAHL		TVIDVDHGI
				FSYSHTGL		MQITSLHSL				VALLFRQL		IQYDRTLLV
				EDFKLYKY		KANDLTHSL				KGFYFAKL		VNVERVLNV
				SAFRPSLL		DQNAATHLI				AALQYRGL		SGLQNFEAL
				QWFQPPNL		SSPLNHIYL				TQFLYPKV		NALLNSENL
				SNYQMHLL		QKVKNTEYL				LSNVPLAF		SSIVNSIQV
				SSVRPGLL		TALDHYSEL				IMYNVTEL		SQLNELHHL
				ANWEYKSL		ERYIHLENL				SFYGSSSL		SALDNGPQI
				VVARFLSL		ISIAVIHHF				KIYYFAAV		AAIVDGDRI
				ANHRYANV		LLNQQVHSL				GLTAQPEL		VTYHGFPNL
				MTHTIHKL		QIYDIFQKL				WEEPSSGN		QLSDTLHSL
				NIFVFKEL		AQVQLLHQL				SAYRFSGV		TGYSTPTAP
				NLFVFKEL		KAIVNVIGM				VIQVFQQL		YAPINANAI
				DDFIHQHF		DSLEEIHAL				RQYMFSSL		SGLTNRDTL
				KAPGFAQM		AALRFLSQL				KVVEFSEL		YMGTNIHSL
				LNDNFVKL		VQHPLLHYL				LAPTFSNL		SLLPLPHHF
				IWITAAKL		VNIRFIGGL				VNVYYTTM		STVSNMATV
				VQVQYKHL		ILNSNEHLL				RIFQFQNF		VSLLDIDHL
				AINIFQKL		QQQPQPHHI				ATRSFPQL		VQTQIFHTL
				THLLLPRL		VGVASTVHL				GIENIHYL		VSPTNPTKL
				AFVRLPSL		VQNILHWSQ				TEVPGNFQ		AVYQFGSAL
				VTIKFMKV		VYYSHVLQM				TAFRFSEL		SQTPQLHFL
				TSPAYHKL		DQQESLHKL				TSIAFKNI		DVANKIGII
				TEAPLNPK		TGVTNRDLI				EDSLLPVM		GDNPKLLLK
				AVYLHALV		VAVVNKVDI				ISVQFNQL		VNIDYTISF
				IRIVLVGL		VSIAHGTPV				VGPRYTQL		EEGPPSYYD
				KNYIHRDL		AGPSRTVGL				IFYYVQKL		SSYGQQSSF
				LIDDVHRL		IFINLPRSM				TAPVNIAG		SAIFNFQSL
				VQYKATSL		KQILNIYDL				TGNPTGTY		ASIDILHSI
				EDVVLVRI		KIAPNTPQL				FSPEYAVL		LSVQNQDLI
				VNIRTSLL		FGIKNMDQV				GLAHLHSL		SQHVNLDQL
				VHILLQGV		AMHSLPHVI				EPPVQESV		SASPAPPTT
				TSFRLPSL		ALNDNFVKL				ENVPSSVT		HAIENIDTF
				GHDLKHDF		INFYKSNYV				TSTTFTNV		VAVTFSERL
				EHFEFHNL		GALKNTDYF				KVLVFSQM		SSPANLNAM
				SALRFLNL		AILERFPTI				KVLHFFNV		SQIVNPESI
				SSVELVHL		FSVTNPHTM				SNLKYSLL		SAPENAVRM
				KVILFAEV		GQVTFLHVF				AAYTFYAL		DQNTATHLI
				VSFLHTVL		KNLEVFMHV				GVNVSVNA		LSYTRFSLA
				INVHTVNL		LLQEVEHQL				ILNPDNSF		KELQTLHNL
				KTLLFVRL		HATLVFHNL				SPDASTLE		SLIILKQVM
				SSISHSVL		TPVKNIDTV				ISYQFSNL		TGIGGHKAP
				ESTLHLVL		QVLELQHTL				LSNGDHHF		RLLEEIHAM
				VIQMFKEV		TQMEELHKF				VNYDYSTL		DLLGTLHNL
				TGIKFVVL		KNIDRFIPV				ASFLYAEI		AALQNLVKI
				AQLEYKLV		VNQERFPNV				VAPSFGTL		YQFALTTEI
				LSLRYHNL		TQATTTHSI				VNIYYETM		SGLLNPYSL
				TTGPVRIN		IIAEFKAEF				MSYLFRNI		AQHQQVRQI
				GIQNVGHI		GLNKAIHYF				TGNTYTAV		TSVIFVNNF
				TSLRFVFL		RLSDQFHDI				KVIHDNFG		MEDLSSGLG
				TGITDHIA		DQMDRVHTL				SQYVFTEM		GGGGNYNDF
				SVITVKNL		VAPAAHTHI				STYSVAKM		NISGVIHAL
				SSIEHISV		TSYRFTTEL				VGFIYGYV		LAIINPVEI
				KVHSFPTL		SSVSFKERL				AAYAYSAL		IAPTNAEVL
				IRIGHTGM		VNFIKENLL				STYKFFEV		SAVQNVADV
				SSVKYSKI		AQNKYEREL				VAVIFSGL		ISPENHISL
				DMTNEEFR		SNVNYYNRL				SFSKAFGQ		TALQVFHNL
				TADKYAAL		KTYEHFNAM				SGLNYKKL		AMSSQLHSL
				IVELFRNL		IQNGLSREL				SHYEFHNI		KIYQWINEL
				VGIQHSLV		VAFDRHLYV				SAFDFENM		NYAPLSRIG
				KVYLYTHL		SQLEKLDLL				ESLVYTTL		TTQHFMDIK
				KSVLFHTV		AAPELKARL				SQFKYALV		GAVTNVKVI
				RNAVFGKV		VSHIFETRV				VNYDFGHM		SSYTFPKMM
				VTIKYSKL		KQVTSAEHL				VNVDKVLE		GVQDPRILM
				STLLHTSV		SQAAEKHSL				VANKIGII		GLLEIAHSL
				SKYYHGEL		AGMAYIERM				SAPIYKRI		AAIENIEHL
				VGNHVAKL		ALLHLVHDF				IISTFQNL		SQNPTNHLL
				EQSDLVHR		KTFQKLSNL				TNLIYQQV		FSGSNAEQM
				ATIRFHDL		NQADTTHPL				VAYEAPSL		AKLVNQEVL
				IGHRYIEV		AFYQFVNNL				YSLVYQAL		YTATNQDFI
				VGMKYRNL		ELLRTVHTL				KVVKFSYM		VTIEYYSQL
				EDVVLEHL		SAPTARVFM				VVSVGQVF		SMTLAIHEI
				YGLAYRSL		AMLAVKHGL				SYEFVQRL		VTLENYTHL
				LSNGDHHF		LSMRNTSVM				VNYLYGQL		GPPGPAGPA
				SGPKHLNM		TSLAFESRL				VSFTYRYL		VSTGDVNVE
				SSMVLTKM		KLMGQMHQL				VIATFSLL		ILNSNEHLL
				VAPHLTKL		IINTHTLLL				DESGPSIV		QQQQQLHSL
				VSLKYAHM		KTIYNVEHL				VNLAYENV		AKSIDFPLT
				EDYLRELL		SQIWTVHVL				SAPLFTGL		TSIKNQTQL
				ADFETVRM		FANVEEHSF				STIEFKNM		AAGDGDVKL
				ADIIMEKL		INMPREVSV				ATLVFHNL		AALKLGQEL
				ADLLMEKL		EQLVHFHVM				SALTFAGL		LDAAGVASL
				YDEIKKYT		RSLENYHFV				SNYRFEGL		AVLTNPETL
				VAVVNVHS		ASLSNRLYI				INFDFNTI		KTNVIQHDL
				SVDMKIGV		AALINRKEL				SNIQYRSL		QLIPNDHSL
				DDVIHHEV		AAGTNKENL				VALKFSQI		DFQGSTMLT
				SDFVVHEI		SNVPHYQNL				SGPQFVQL		EIAAKDKLS
				SGMQYHKL		SNIAHMVGL				ALDDFVLG		INQIYEARV
				KNFKFHAL		KMIENYEAL				KLTGIKHE		ALLPQNHKL
				ASFTFKKI		KIVVLLQRL				EIISFQHL		VLNKTYHDL
				IGVEHVVV		FQVTHTVAL				VNFTYQFL		EGLTTKHHL
				TVVRMVTL		VTVENTKTI				IVDPVSNL		GQLLPQHYL
				SSLKYAGL		SLNERFTNM				IDYQYQLL		VALLNLENM
				AIFKAFAM		ASLVNKIGL				YSLLDPSY		KSVANLEYL
				GLAHLHSL		VAFDYQSKM				GVLEYANL		VMVTNVTSL
				SIFIAHRL		MQIDFIHQL				SIYEASSL		SLLTNHVTL
				SILRYGAL		KNFDKLSFL				VAFAYKNV		ASNLPAGIS
				AQYLHTFM		QSLTNILHL				RNYQFDFL		AHNAVVHEL
				VTHKYVHL		EDSVMDHHF				ISLEYSEL		VALRNLEQI
				VDYKYREL		LSYSYQSRF				TKQEEFYA		ATVSNGPFL
				ASRIFPHL		KTTLTLHHL				SNLQYSLL		KALANVATV
				KNFQYRQV		RSYEFFNEL				SAVIFRTL		SFSNTPNSG
				AHIDGDHI		AAVENLKNI				VINSFVHV		RQLETVREL
				AHIDGDHL		SLNGIRHLL				IIQEFPAL		AALLNTDLV
				INKHYFSL		AAVIDQERL				STYLFRLM		ILNPHIHLM
				MNFHDHTL		TTERFGQAA				TSVVFNKL		EVNTVLHGF
				VHDPHSLA		SIYRFHAQF				SAYLFVKL		ESYSFEARM
				TGATYPHL		AMNVNEIFM				YVSPEQLS		KQNEQMHAL
				SAFIFRVL		VVYTPWSNL				RQYIFSKL		GAVFNGITL
				SALRFLVV		SSATNRITV				ATFQFSNL		VAPSSVVEL
				AAAQFTKL		SAASFDGRI				SSFVFSTV		GYNGYGGGP
				VGVAYKTL		AQYLVPHNL				AVDPPKAD		TSAQNVEFL
				VSFLLPKL		KSLERATQL				VVYEFSTT		RLILEVHQF
				VGIKYMGI		YQIAMVHYI				SYHTDGFN		TSLPYYTGV
				TDFKHHFM		DQDSEAHEL				AVVFTARY		AMHSLPHVI
				SAYRFGLG		ISLHNPVSI				VGLRYEKI		ATVENLNEL
				AGFLFQKV		YAPMGMHPM				YNLDYTEL		VAPYNTTQF
				DDMLLPHL		NTIANKLHL				ALVRFVNL		IQAENAEFM
				VGPKFRGV		RSIQNAQFL				FAYRFSNL		EMLHELHRL
				QNNVEHKV		NMLEAVHII				QALIYAEM		GLSAVEHRL
				VHVKPENL		VNVQKISNL				ASYVYLSM		TNYRFKNLF
				VTVKIGDL		NELNIIHKF				AWIKVEQL		SEELHYFVQ
				FDVPVLKL		QQQQQQHNL				GSGSYNDF		ELNSNFRQI
				MLDTHHKL		EAIKNHEEL				SGYQYKRL		KILEEAHEL
				SAAKLFNL		VNSTKVANL				ASGPYGNF		DALTNLTVL
				GPSGKLWR		ILLNIEHRI				EVYSFSGL		TSLLNGPML
				SNGDHHFM		TTFEHAHNM				VGPMYSYV		TILEFSQNM
				VANKIGII		ALLQNKDVI				SSYSFRHL		LMNFHDHTL
				AGLSYSKI		YQQDLDREL				FTSSFQGI		YGGGYGGYD
				TDFIAHLL		TSFQKEAEF				LSYQYSGL		KSYSFIARM
				SGPIHVLL		YLMKNADYF				TNVEYAHL		LSMRNTSVM
				STFVYNSM		YQKENKDVI				MMPTPVIL		KVSDILHSI
				STFIYNSM		RIVAFGVGL				SSEGLLGL		SAVKNLQQL
				KVYNYNHL		AQQHWRHEL				VAYKFPEL		PSEATLHSL
				SGYDFGYM		EQYNRFMKL				TSLVPFVD		VLSEIMHSF
				INYVVAHV		VNFEDYQSV				SGLKYVAV		EIYSFSESL
				KVLVFSQM		AGIENKFGL				FVAATYKL		SVAGVLTNK
				VIKVFNDM		LSVRNGATL				VEQSRLVA		AQHGRFLEI
				SIVQFYYM		ALQEEKHQL				QGPAYSHL		QAPTSVTFL
				SQYVFTEM		STWSVDRQL				INFDFPKL		SAYIFNSNV
				VNLAYENV		SVAELQARL				ETLPEEVG		VNVDHPINL
				LQYEFTKL		IGPLYPHAF				AWIHAAHV		IQPDNIVYV
				IISTFQNL		TLIENGEKI				HGYTFANL		EQNESAHTL
				NTYIYSGM		AHQVNLEYL				ISLEFRNL		GQVINLDQL
				ITYYFDNV		ESNWTVHVF				AQFEHTIL		EQNYIPHVM
				VSYTQAQT		VTIENHPHL				SVVGFVEL		AVLEVVHEL
				AHYTYNNL		VFNFTIHEI				TNYNFQYI		RLDPYLHSL
				VNIGFTYM		QSLRNIHTL				TILSFTNL		LSVRNGATL
				VAYTYDNL		YGLLNVTKI				TNVDFPSL		TSYPPQTGS
				SEFDFEEM		FQWRNLNTI				KNYDFAQV		YNASGRLTL
				SSYSPQSL		AAIKLQELL				YKFKQPQS		AQSFIAHNF
				SDGYGGNY		KAKVNQETI				SAYLFTYV		QVLELQHTL
				VIISFNSL		LRHVNIDHL				RAFEFKSL		QLSQVLHRL
				EDFVVDGF		RNVAKLLYM				ASYLLAAL		EMLEAPHQL
				SFYGSSSL		SSLQNHERI				YTEDQVVS		EQMSIGHHI
				YVFTYAKI		KIFEKHAYL				ALLSFTSL		LQLGIPHSF
				SAFDFENM		ISYVFEGKM				NSFRYNGL		VAYRHLVGV
				TVYEYDSV		EVNTVLHGF				GFGDGYNG		VTIQNSELM
				INTAYTNV		GSVSNIYKL				EDLKLTEL		AALLNQQFL
				VINSFVHV		VILEYFTRL				TVIIYVRL		QQLQQQHLL
				AAYSFYNV		EQLEHVREM				PEAFPALA		LSIENAEEI
				ESVEFQNL		MQLADWHQL				ALLSTGSK		SLLEHSREF
				SAYDPSNL		QQLPGHLGF				SSFQGIVD		QQELDTVVK
				SILQYSNV		RIIENVDVI				LTGIKHEL		SFGGAGFGG
				TIVVFNGM		EQNPEAQAL				VFRELPSL		LAPTNLSSS
				SQYYYNSL		LSIHNGPSV				STIHFYNL		SQDENYHHL
				VNVYYTTM		SMMVKQEGM				KAFTYINL		SSLVNSQTL
				SATGFSNV		QTFTFTQKI				SGIDFKQL		ASVLNVTAL
				QNYNYEQV		AQYSLPTSF				KVFEYHNV		SQIGNLEAL
				QVYGFLEV		THLLNSEHL				SDGYGGNY		DLLPQEHVL
				TTYKYEMI		VLTQQYHQL				AVLKYYKV		KANPIQGFS
				VAFDFTKV		ELVQQYHQF				VNFKFGVL		ETLTEPHQL
				SFYGNNSL		ILNPHIHLM				ISARFVQL		IGLQNGVLL
				SSFTFGNS		FYGKPLPPL				RNLDYARL		FGVLNVQTV
				IFEFKETL		KQWLNKDEL				RALNYTHL		SQVINPTAI
				TSTTFTNV		AMWSKDSYL				FGYEYITV		KSVINTTLV
				TEYVFTHL		KQMLLFTHI				SGYTFSAV		VNLKEYPAL
				QALKYFNL		VGPEFKDKL				SHPREPTL		SSYRFVQNV
				ESPLFNNV		SGPEYLKRL				VGYRYETL		SSPQFVGNL
				VNYDYSTL		AFEKIPEFI				SSPKFSEL		TDFGWEDAL
				VFGYDNYM		IGHRYIEVF				TSFRYSSL		HSQGLGGHY
				ASPIFTHV		VNFLHSNKL				SSYDFTSI		AMGVNLTSM
				VSYLFSHV		ISGVNRYYV				SVLNVNHI		ASNVTNKTD
				STYKFFEV		YLVSHPHDL				VTFIYQKL		GSPMNTTQL
				VDFDYDEF		DQLQPLHTL				SLVNADKL		GDFGDWSAF
				MAYMASKE		QLSQVLHRL				EDAVLEYL		FISDVEHQL
				IATEFNQL		QSNDTFHSF				VIVDANNL		TAPYNYSYI
				INFDFPKL		SALRFEGQM				IIVSFVNA		SGLAHLHSL
				TNISFTNM		SSLMKVENM				YNFQYISL		YSITNTEEL
				VVYIYHSL		KMYEFAGRL				KEYDRLLE		KIDHILDAL
				YNGYGGGP		GSLTNLHTL				ATFSFESL		INAEFVTQL
				IIITFNDL		VAYRHLVGV				TGPGILSM		ASSGVTVSA
				EIISFQHL		VSPRGAGYL				RVYFNKGL		SSPENKNWL
				TQYTFSSI		AIVNFVSKV				TSYRFLAL		SALKTIHDL
				HGYTFANL		VTFERVEQM				VIHIFSHI		SHPREPTLG
				EDFVGQEL		SNYERLESL				VWLDAAAL		VAPTNPQAV
				QGYEYDNL		KYNDVVHDL				SSYTFEQL		QQASDVHEL
				SNYSYPQV		SGILDRDTM				VNFSPANL		KNYDFAQVL
				SMQTVFNM		VGVYNGKTF				VRYSHEKL		NANTNTEVL
				QNYNFSNM		WAVSNREML				SNPEFSSV		MQIDFIHQL
				EIITFTAM		IMIQFKQYM				LPHSLPQQ		DVINVFHHL
				TPFEFENM		AQAIHAHLL				TTYQMAVL		ENIQLPHTL
				KAFTYINL		SQVLNRLTF				VIISFNSL		AALQNAVAF
				GSYQFSMV		RILEFYSKL				VNNEFEKL		HQLPLPHNV
				IAFIFNNL		SSVRDTDSL				SSQQFSGI		SQLELKSLI
				YSLQFTNL		SLVKNVAHM				VIYPMAVV		VTFERVEQM
				AWIHAAHV		INYKRLVYL				STLLYGQL		GQIQNKEVL
				QTMVFYNL		QIYARQYYM				VINVFHHL		DPDGKVVLS
				SVFIAQNV		VNQFFKTML				SSPYFAAL		FQIVNPHLL
				SGDGYNGF		SSLGKHSTM				WLPVQDLG		SAYQRGESL
				HTYDFEKL		SSLSNEHVL				VQQLYTTL		TLIVEPHVI
				VNYLYGQL		ALATHDNPL				PALIYSST		TGPGNQDSL
				IAPAFSSM		KIAQFLETV				IAPIYKKL		GSYNDFGNY
				NGYKYMAL		RLVPVLHSL				SGSYNDFG		MSMTNATFI
				VGYGYPAA		INAARGLGL				YLGPDEND		AVNMHFHDI
				VMFTPLTV		EDYHFYQGL				ATQVYPKL		ANFPRATGL
				SVVAYNNL		SNYQYLLHL				VSLQFAEL		RQLISAHVL
				VDYEYSEL		IVFEDFARL				VTYVYQLI		VAPSFGTLL
				TFFTPGNL		VNYHYMSQV				SSAQFLGL		STPVNVTSL
				ILDTFEKL		AALFNRTEF				LVYKFMNL		TNVPTEGFQ
				SGYDYSYA		FQSILKHDL				MTEPIDEY		AQFEFTETV
				FSQEYINL		QIAEFKEAF				SNVVFKLL		IQLEANHVI
				IAYGYNNI		VMLEIYRNL				SSYIFSLV		YQGQNAWFL
				SFVELGQV		SSLINHKSV				INLNYKDL		FGVGGLGGL
				VFYGVFTL		YKNVNQEVV				AQYEDIAQ		TLVTIKHEL
				VGITYQHI		HALETIHHL				QNDPVEIK		EQLEVHHSL
				TGFSFGNT		VQYFFYKNV				TSYQFAAV		TTERFGQAA
				ISYQFSNL		ANIRNMSVI				PHQPIENL		SKDNFHGLA
				ADTFLEHM		NQYENAEKL				QSVAFTKL		STWSVDRQL
				AGYMYTQL		YSIGNLQKI				SSPHYTTL		IIQENFPKL
				VGPEFDSM		VNSQREYQL				AQYNFILV		QLLTQEHVL
				ATLVFHNL		SQNGSYHHI				SVVNFTSL		TDAPQPDVK
				TSYPFDTV		VTNQEVHDL				AAVKFHNL		KFLEQVHQL
				VIFEMTNL		SAMSNPRAM				KSFLYPSL		TPLSTGGTL
				EDEYSEYL		FAPNSVHYL				QNYSYSSI		NQVDSIHAL
				VNIYYETM		NIFQKLNYM				QAYDFPAI		RALSNLESI
				VNYQFTQI		GPDFGTKKL				INWIYSSL		YQYTNSEVL
				SSFEYGQV		FSLENLRTM				AIVEFATV		KALINADEL
				SQFEFTQF		ANVQHVLHL				VALLFTGI		AMAPRTLLL
				VWIYNSQL		NMHQNIKYI				NKRIVLFD		ALIQNADTL
				VMYQPTQV		SALILRTKL				QVFIFTGL		VQLPGLHEF
				VVVMFTAL		TALLNAPHI				VQYVLPRL		KLLPEKHEI
				SSPKFSEI		QVLPLIHHL				HTYDFEKL		SQTPVLREL
				SSPKFSEL		KIQEILHNL				NAAPGVDL		DQSQYIHHL
				VNFVHTNL		EQNHLLHLV				LALGLRSL		LSVTNSEEL
				AFYTVAHL		KQNYVKHMF				ISPSYKTL		VEQKVQSLQ
				SVHTFPAL		SAYQHSSTF				LIYIFNTM		AALVNLDSL
				VNFSPANL		EFIEVFHEL				IFEFKETL		EQQPQQHNL
				FLEQVHQL		KSLITTHHL				VVDVFTQL		GSLKNVTTL
				SEFEFTDF		SAFTRVASM				SSYAYTLM		KSLKNFITI
				VWTETTQL		KIVQFIVTL				APINANAI		EVIPLGSQE
				LIIEFDNM		SAIQNLHSF				VSVSALTL		KAYSFKEQI
				SIYVYKVL		RMPEKVTWM				LIYKFLNV		SQISNTEFL
				NYDYVHEL		DAMAILHKL				PTEEESPV		AAVENVSEL
				SVDTFQHL		QSHVHVHDL				SFLDVRNL		ALLRDVHNL
				TILEFAQL		KLLPEKHEI				PRPPPKPM		TYGPPQPWG
				YAYAPSSL		KQVKNGPSL				VAPLYKRL		VSPLNVTAV
				TDTSIEEL		FAIRNQIKL				SNVKYVML		EENEKLKLG
				TNYIFDSL		VMSERVSGL				AIRNDEEL		FSVLNWDQV
				TTVAFTQV		YAIKNIHGV				TIYKFQGM		TAVEFSNQL
				KIFTASNV		AANINKESI				VNFEFPEF		EMTEALHDL
				VNYKMKSV		RSYLFLGGI				STLIYRNM		TQVLNTHYV
				STFVYNTM		NSLEEEHVL				LNDLIHNI		LLNQQVHSL
				SAFQYGPT		SNYEFHNRV				YGAYPTQP		KLHDVEHVL
				YAPSYYHV		KILVFSQSL				TQQLYPSL		SQLPGTHEI
				TSIFFESM		TSQEYSARL				IEESAIDE		VQIKNDVFI
				MDVAASEF		TNIAREELM				YDEIKKYT		GPYGGGGQY
				YSYSFFHL		KQIKNSSLL				VSYQHAFL		SQDGVQHLL
				TNVQYSNL		AFFKTLSNM				TAGQYPYP		STVFNPSVL
				VFIDLPTL		SAWKHAGAL				SSEGLLGI		NSVINVSNL
				VIVRFLTV		TTPQNQVDM				AVYIHALL		IQPINHTTL
				AQYSFDKL		GTFQRSAGL				SALQATEL		ADNLVLNLQ
				SVFQFGSS		FGLSNYHQL				SVYGFTGA		TQIRLEHEV
				IAVQFVDM		VNLKKKSYL				AITSINDS		ESQSVIHNL
				SIANFTNV		VNHEYKEKL				VGIGFSNL		LAGQATTAY
				ISVQFNQL		NMPDILHHL				FTIPLGTP		KNFKFLGTL
				TDMIFNNF		VGQEYLERL				KNLRYQLL		QLQEELHQL
				FQQEFPSL		VGHDLKHDF				ISVRFHNL		DMTVVEHQL
				FAFGENKM		EQYDTIHRL				GIQKELQF		QQNNVEHKV
				QNYDVAQV		KQQDETHTL				GGYGYGYG		VNIRFIGGL
				ATYIFNGL		GDYADFQYL				VSLRNLLG		SSVLNVVSM
				SGFSYPNF		EQFKELHHL				LITGGTYA		SAVENLNEM
				ISLDYQHL		AMQEFLTRL				AGPAPVFA		QSIAFISRL
				IAPQYYDM		SSQSIIHHL				AQFEHTLL		SQGVDWWGN
				LQYIFAHV		KSFAFISAM				YNGYGGGP		TSQLPLESD
				AIFNFQSL		MAAFPKKQN				TPYEPQPT		TGPDYYSQL
				EDFLYSGF		AKDVKFGAD				QVAEQFLN		SSEAPPLVN
				VIQVFQQL		NQIYYYHNV				IEESPIDE		TQAGEIHDL
				VAYEFMSQ		SHLINHVNI				ADFELHNF		STNEENPVT
				VIVDANNL		SMEVNVDVL				EGLPEPIT		MAAFPKKQN
				EIVSFQHL		VISDVDHKL				GSPRYAEV		TLLETGHDI
				ISFKFDHL		SLLNKQETL				SVLPYEYT		FSQENTEKI
				QAYQYEQI		YTIENPRHF				VTLLYSQL		SNYEFHNRV
				DIYSFSEL		FAYTVKYVL				SAPTFINF		KMLAAIHTF
				HTFTYTGL		QPPYNPTYM				ISFEYSTI		SADTWNGVG
				FTFQFNNL		QGLTVEHAI				TTPVYVAL		AAIQGAVAM
				INFDFNTI		VNFEKLHMI				ITGLSTSA		SVETSEGFL
				ATQVYPKL		VMLETFRNL				SNLKYILV		SSPANISSL
				EDFTFNDL		SLHSQVHQI				MVPVTVVF		TGVVNGESL
				QTYYYTEI		MLLANPHEL				SGASTGIY		IQDVTLHDL
				VVYSYHYL		KESTLHLVL				WSMTSDIF		FGPVNHEEL
				LVAIFTHL		VKELLLHIR				FKGPHLVQ		VAYKFPELL
				YGYPYNAL		KSAVGHEYV				VIFIFTKV		TANPQTHSF
				SSYIYGYV		AQLIYRHLL				SVYTHSYL		AALENDKTI
				LSPVYTHV		GGPLGQTHL				LMEHIHKL		GAPLNLVDL
				NSIAFNNL		SQAFISHHL				SSPKFSEI		VLLTHYHSL
				TAPLYKQI		METHIIHTF				SGPEFTLL		ADFGFSNEF
				SAVGFNEM		SNFNYERSL				SNIHYHTL		ITTEVVNEL
				TQYDFVEL		AAMLLQQVM				SIANFTNV		TASAAPPQT
				VNYEPLGL		SSFHFNQHL				VAFDFTKV		SAPDNVLEV
				IQIEFNGL		VGPKNKTSI				GVGDDQLG		VGVPKEIFQ
				VFYQVQSL		IVYTFMTHF				SLGYGQSN		TQFINPETP
				YSLVYQAL		TAVTNSARL				EVFDFRGM		VAVPLIGKL
				NSFRYNGL		IIDEKKYYL				ISPLFAEL		AAPINTQGL
				SAFEFNEL		SSINFLTRV				EAPEFIEM		GSVLNASTV
				AIVSFAHV		SAIKGLSAL				YAYAPSSL		LSGVAVVVL
				IMYNVTEL		VGPPRGALV				GGGGYDGY		LQLVEFHQL
				GQFSFAEV		IQVRNPVAL				AQYKFIYV		DPSVKSIYQ
				QSMNFSLM		STQKFFLRV				GQFQFTGI		AQLGLGHSY
				SSLYFKNI		VNWDFVEQV				SVDMKIGV		YQQPPFTQN
				IQQQYAQV		SGIAGFSHL				SALIYSNL		AAPISPWTM
				ASITFEHM		VNIRFVGGL				TNYRFKNL		SGLINHQRI
				ISPSYKTL		KALVNAVKL				GPVNHEEL		ALIGVDHSL
				INFLFTGF		EDIDRVPFL				SGPTYIKL		SQLSTHDPL
				AGPTFNYL		SSSLNQEKI				FSDGYLAL		FAHTNIESL
				STYSHSAL		ALISYQHKF				DMKTKYFF		AQAIHAHLL
				ETPVYANL		QSLELVHRF				FNVHSAVL		SAIAFSNVF
				AQQMYQSL		ASYEFQREF				INYSYINL		IGIENIHYL
				EDLLLQDF		YTVKNGDSL				SLLQPLNV		AALANATVI
				ASYEVAHL		RQHEKTHWL				TSPEFTSV		TQATTTHSI
				VTLLYSQL		QILEREHDL				STFSFQGL		KLLAVIHEL
				VIGTFISL		GMLEKIDMI				VSPYFVAL		SDGTVPFWA
				VNIEFKDL		VQNKNSSYF				ITYYFDNV		WVLVNEKPL
				TKQEEFYA		FMATNPEHL				STFTFADL		ISYDYLTSL
				STVEFTNL		QVFDAKNMM				LATERKIK		PRANPSAFL
				IGTPAMNM		KTNVIQHDL				MPISGIIE		SFSDYPPLG
				ATPVFGQV		QQLQHQHFL				SMVDVVML		LPPLGGGLG
				QALIYAEM		FQQDDAHIF				SYNDFGNY		IAYLYNEGL
				ILYTYSGL		VNNAFLDRL				TYGQQPTA		EVSFVIHNL
				LIYTYSGI		YQQVVPHVI				YGGGNYGP		EAQDDSILK
				LIYTYSGL		FQNEVARQL				SSPEFSEL		TLLNVYHAF
				YVLVYYNL		SDLYLEHLL				APENAVRM		SNYQHITNF
				LQYVYNLV		TNFEYLTHL				SIIKATNL		GSLSNHTEL
				SVVVFQSF		VIAEILRGV				SQPGAYQP		VAGYAAQLE
				EDFEVSSF		GQTIIHHHI				VQFLYREL		VDVTNTTFL
				SALIYSNL		LQLDIRHLW				KVYTFNSV		VITNFSARI
				EDWESTLF		IAAPFTSKL				SVIKFENL		GGFGFGSSG
				YGGGNYGS		IRPEHVLRL				FAPIYADL		KQLVNKEHL
				SAMVFSAM		VGPFLLTHL				VAPSAVNL		DQYKRETIL
				VFTEVANL		EQHIDPHVL				TNYIFDSL		EDYKFHHTF
				ILIVYENL		FSHHSMVSM				LLVPGTQG		EVLRVTHEL
				SSPLYTTL		KTLLNPEYL				GPHSLRYF		AAIANHQVL
				EVYSFSGL		HSPTNTVHM				SLIIYSTV		AAVWNAQEA
				ITYTYDLM		SVFPNQDEM				NGYSFINI		NGPGYKVVD
				QNYSYSSI		EAPESYKNV				TWQQGYGP		SSLQNHERI
				TDTLINYM		RVSSIPHDL				ASPVFARL		AGPSRTVGL
				VQFVFDAV		IMLEALERV				IQQQYAQV		ILLNIEHRI
				VVMDYENL		DQSQYIHHL				IAPVFTAL		AQNKYEREL
				SYFKGASL		KVSDILHSI				YNEGGNFG		VNIDIIHRI
				EQYKFYSV		KVSDILHSL				SAPSWPSL		VAAANREVL
				SSVLFETL		EDLDLAEKM				GNYGSGSY		NQQALSHSI
				IVPLFTNL		TSNGTLHSL				ISTSFPNL		TAVANNQAL
				VNQKFNNL		MAYKYLEEM				STPEFYQV		TGTTNPFLL
				QNEQMHAL		SQQQYFHRL				SSLLFTQI		VNYRHLALL
				SNPEFSSV		GAPLNIHKV				TALMFAAL		VGVNNPVFL
				STIHFYNL		DMSEIQHTL				AVPEFQGL		EQQWVSHTF
				TQFLYPKV		YQILNNEVF				SNYVFVFL		SGYAFTNYL
				GNYGSGSY		AAMLNYTHI				SFVELGQV		LVDSGAQVS
				ISPNFNFM		SGRGFGDGY				AIFNFQSL		VLNPTDHWL
				QLEVVHTL		KNLVFVVGL				VTYLFVQL		NQADTTHPL
				VIYPMAVV		VGVERAAQM				SGYIYHKL		SILVNQEVL
				LDVEHNLF		SSVSKQETI				SAVVYAQL		SAIGYLHSL
				NAPTFGSL		SSYNFIRHM				SNLLYVNV		VTVVNSQTL
				SGYYFTTL		ESFQFYDRL				AAVDDLQF		SAVWNSPPL
				ASYEFTTL		VQIAAYHML				AEGAGDAK		TNPSFDGRL
				LTYTFSGL		RMIQNQNAA				SSVKFNPV		SETAPAETA
				SSYAYTLM		TNLVPYPRI				LPSTPGLG		VSLYLHDNT
				AYKFGKTV		AAVKNEVNV				ITFIFKSL		QILSDFPKL
				AAYKFGVA		VDQVFQDNF				VNRSFIAL		FQNVNSVTL
				ILSDFPKL		ATLERLEGM				SILLYSTV		RVAPEEHPV
				ISILYHQL		IMNFTPHNW				SGYSFTHI		ISPFFPNGV
				LIYTFTTT		VQLEPAHLL				SIVSVTAY		LESPIDPQS
				SSYPMASL		SDELIKLYL				LVYQFKEM		FAIDDHDYL
				HIYEFPQL		IVHEPGPVM				QIIPFKTL		EIIKDIHNL
				YQFVYQNL		KVTSQLHHL				ASFIFRQL		AQLLHVHEI
				GSYSYTQV		SSYRFVQNV				LQVSNVLS		VGLINKDSV
				SSYVHSNL		AGVSNVLKI				IAYEYSEL		ESPINVTTV
				IIVSFVNA		VQTQIFHTL				ENYSFEEL		TQLDVPHVI
				SVVLMSHL		KQLEEARQL				AKFIRNFA		ATYSYKEAL
				VNIAVTNV		IGVDHVARM				SAYLYQSL		SVSYASTNL
				MNITYSNL		NSNSIYHTF				LAYLFAQL		SSPQNQEQI
				VNVDYSKL		YQYDFSRTL				TWLVVTTL		GGYGGGYDN
				SIVSYNHL		RAIHNIFRM				EDEPTDLA		GGPINPATA
				FGYGYPAL		VINFDFPKL				SSPLYTTL		AAPTNANSL
				HIYSFSSL		SGHDLIHRL				VNVDYSKL		NALENINVI
				SVVGFVEL		SSFRHSQTF				ESPSYRTL		ITSMTRVIE
				IVGEFSNL		YNVINREKL				KNFVYRTL		NMPWNVDTL
				SALITTNM		ASLRFDGAL				NYRTQLYD		ASVLNVNHI
				ESPESDFM		AIYEFIHNF				VITKFINV		RQILNADAM
				EDYNLYTF		AELHQEHDL				ENEKLKLG		PVVFETEKL
				SSGINVNA		FSLQNQLRL				FQGSTMLT		EQPNIVHDL
				VTPPMPLL		SQWSLQHEV				TGMGASLE		TTVTNSTPL
				EDVKLLGM		TSSVNKEQL				YMVGPIEE		IKQLNRQLD
				SGYSFTHI		AQIDHYLGL				SGYDFGYL		VTVLNVDHL
				VAPSFGTL		SHIKKDVTL				SVLYKENL		YLMEVAHDL
				QNYEMAQM		AVIQFLERI				VIFEMTNL		FAVVFTARY
				AAYEFTTL		KFYEEVHDL				TGFKVGIN		AQNSSLREL
				AWIKVEQL		KTVVNISSL				MSFQFAHL		TPEGVQAVN
				VNFSPADI		KALKLLDYV				SITSFPRL		VTDPRNILL
				FSYQFSDL		KDAVLDLRF				VTVVFSTV		GGPENVAEM
				SNMTYEKL		TQVLNTHYV				EAYRFTGL		EQDIVLHGL
				ESFTFPEL		EALKGLHHL				VGINYREV		YSSENQEAI
				VSYVFTEV		TTYVHKGLL						RLLPHMHNI
				SNYEVFQL		LKVVNIQTI						SMMDVDHQI
				SALQATEL		SLILFSTRL						SIYRFHAQF
				MLAAIHTF		TTVANLDHI						TALENLSTL
				VAPSAVNL		SDGEPWHVM						ASLTNNQNL
				IVWEFEQL		SMAVSRYYF						EALSIAHAL
				ATLEFTQL		ESIKYNHPL						SSPSNKFFF
				SSYTFEQL		VNLIYHQRI						SGLSGHTTL
				SLTAFNNL		SLLSNHERI						FSVTNPHTM
				SVIKFENL		ANYVHSKGL						VNVNERLVQ
				GTYDYTQL		KGLEYLHFM						FSEENHEPL
				IGLDYSSL		KVYSYLNKL						VSIQSESSL
				SAVVYAQL		HQSNVFHHI						SELQVLHDI
				VVESTGVF		GAIVNGKVL						VAFDRHLYV
				VVYEFSTT		GQLGSLHLL						TSTTNPEFV
				VVYPFPTF		SSPQHPASL						TQDQHLHNF
				TIVTYQTV		SMFEFSEKL						GSSPKFSEI
				TPQNQVDM		ASFSFGGKL						GAGYTFTQI
				TSMYFSAV		KAFAFHSTL						YQMEQDHNL
				VNYPFIDM		KSLVSKGTL						NVLRQLHEL
				AAYPFVNM		TQIQHIHKL						TDFTNVTSL
				VALTYQGF		KILEEPHPL						GALGTLHQL
				ANLSYQSL		VTHDLAHAL						ASPANVGTL
				SSPHYTTL		TAAENAEKI						SQEALSPVH
				YSPAYAHL		NLNEHNHHL						KGVYNKSTI
				LGYSYVEL		ASVLLQDHI						DQIQNAQYL
				LMEHIHKL		SGLLLKQHI						ASARNLEHL
				SHSSTFDA		ADFSQFEQI						NQIYYYHNV
				GILTFSNL		FMISHLDYL						VALINKDFL
				QALVFSNL		EQLSDPHPL						GGVVNMYHM
				YNFQYISL		ALIHSTHSL						LSAKNKDYM
				VFSQPGAL		AGFSKTSQM						ALSGIAAQL
				IWTIATNL		KAVVMLEYV						GSIINISSI
				ISPAYFFL		HMIAMIHSL						TLEENGAGD
				IDYEFSAL		RQQPIWHTL						ESLRLNHEL
				SAIAFSNV		QQQQFQHLF						SALLLKDVL
				YAYSFKYL		GLNEHNHHL						GEEHVGFLK
				VADKFTEL		QAQSVVHQI						VAPFLRQEF
				SGYDYYHV		SSIGYHTSV						EQSDLVHRI
				GGYGGGYD		INYVFRHYI						ISAATGGLA
				IIYPPPEV		KTFIYKHGL						VAPQSQELL
				VALVYGQM		YVHVNRDTL						NSIRNLDTI
				VIDIMENL		NQLQHNHAL						EDVVATGAD
				AGYTFEYL		AIYKKSQHM						EQSPLSHDL
				TNYNFQYI		AAVFNLIHV						RVLDQPHSL
				ISPDYRNM		LSNGDHHFM						RAIENIDTL
				IKFDTGNL		SSYKFLPLM						VGVVSVEFI
				NVYTYEAV		LVARVFQKA						SGPLDSTFI
				SDFDFPKL		NQILQHHVL						VQIANPAFI
				SWTPYPSL		QQQAEGHKL						YAVGNHDFI
				ASPEFTKL		QQLDAVHRV						TLTNIIHNL
				LIYKFLNV		IALQEKHDL						LLNPHLRQL
				VSYNHTNI		GMLKSLHQL						EQLNINHMI
				TSPEFQEM		KLIEYYQQL						SALGYLHSL
				QTLKYLAV		KDWEMHVHF						ATIINEEVL
				AALIYTSV		DGVANVEHI						VLTQQYHQL
				ITYESPQI		VNVENQTKI						FAHIDGDHL
				ISYLFSQA		ALLDELHDL						VGVVNPILA
				EDFLMESV		LSHINVALI						FAYEGRDYI
				SLYQPAGL		VVLKMVTEI						IANINQELI
				SSIIFEDI		SALIHQTGL						VALENANAV
				VSIQFYHL		STYEYVRFI						STVRNADVI
				SAYTHMEL		SSVEYIHRI						DVALPALLD
				VMVQPINL		SALQLHERI						SIYDAFPKV
				TIILFTKV		LSVWNQQVL						VVLSSVNSY
				LAYGFTEL		AVLGVAHRL						VAPSFLNSV
				SFEVGAQL		KNKEFFAQL						VAPTSTVAV
				SLLPSSNL		SVVQNQQQV						DLIQTIHEL
				ATFSFESL		EQQLQEHRL						SQTPTEHVF
				GVYVFGEL		SSVSNKTTL						ESFSDYPPL
				NMEKYPDL		KQIGVEHVV						QQVQSLHSL
				STPEFYQV		EQLQVVRQF						VKVGVNGFG
				ANYDFYQL		RALQLLDEV						AMYIFLHTV
				TAYAFHFL		SIYMRQEGF						FSYSLGEAA
				SLLEYNNI		EDMSNFDRF						SQLQAEHTL
				VVVDFSAT		RQLEQQEEI						QLLEVQHHL
				SLTEFENL		YQNKEEYQL						QLIDLDHKL
				SGPQFVQL		KNLLNVDKI						AQIVNKHLI
				SGYTFSAV		GQNDIHHKV						VGYRFVTAI
				LHDVEHVL		VSHSQLHDF						SGFGQGFSD
				NEYEFIEL		QLIQLYHRF						IAVTNVQEL
				SSMAYPNL		VVVENITLM						LELEKVHDL
				STLLYGQL		SVLKILHEI						VTYSFRQSF
				YGYTFYSV		AQMQEQHEL						LSYSYQSRF
				TSYLMGNL		ALLGHYHDI						GGSFGGGSF
				TALENLST		ELLSVLHRL						AGPTNVHLI
				TSYQFAAV		SGASRGVGF						SAIINEDNL
				VNFINQNL		YSYQNRYHF						TPGYVGFAN
				SIFQFGKP		ASLKSTSTL						GALKNTDYF
				ATFQFSNL		EDLKLTELL						ISIAVIHHF
				EAPEFIEM		RQAENGMYI						VTDPRNLLL
				IIVIPSTL		HQMEEEHVI						TPANLVVGP
				ISATFKML		SGPWNKTAP						HSALIYSNL
				LLVLPSTL		TSPSYKVRM						RYQPEQPNL
				SFSDYPPL		SGLLNMTKI						QLTQVIREL
				ANYSVGLL		KMLSNKESL						VAYWRQAGL
				SSYGGPAS		SLLTSLHSL						EGLPEIHHL
				SSTHFATL		VYYEHFHQV						SAVVDKDFL
				TGNPTGTY		LVRPGTALE						VLLSTIHEL
				AQFNFQNV		AANVNAKDM						SPYGGGYGS
				SSVQATQL		GSLTNVKAL						RDQKLSELD
				EGPDAMYV		IWEKSIGNL						EQLDTHMEL
				SGYDMPYA		LQLLNTDYL						LIYTFTTTF
				VGPMYSYV		KSLKNYITI						VSSINQEAL
				AQFKFTVL		ILNPHVHVI						SYGAFTNQI
				TGMGASLE		KALDYIHHM						SVLFNLTTM
				VNLQYSEV		VQWNDLDYM						IASNAGSIA
				VPYPFGNL		SLLENLDKL						KTHINIVVI
				SSYDYEAL		QSYIFPSSI						GNYGGGGNY
				VGFIYGYV		ALIVLEHHL						SNLVNENTL
				AALDFKNV		QQQAVMHYM						NVISVDHHI
				SSLEFSQI		SALAINHKL						LSVWNQQVL
				VNDAFTHV		QLNELHHLL						LQLLNTDYL
				EVYLFSHI		KNKWFFQKL						NQQPSNYGP
				QIYEYVEI		RSLYNTTQM						LISDVEHHL
				NAPEFVKV		LWIRIGANV						AMGTNDTVI
				SGYKFGVL		VGIGHLAGM						FQGSNGTVL
				ASLTYQQL		EDFLYHEGY						TGVVNAQAL
				KIYYFAAV		SSLHPMGGL						IGDLQAFVG
				SNIVFTSM		RVVDLITNL						AGPENSSKI
				AAYEYMAA		VKVGVNGFG						SGLSHLHSL
				QLIQTHVL		AAYIWKVSM						SLVDLNTRL
				VIAELVNV		RQHQIEHIF						SALEFLTHL
				EDSLLPVM		GGPDNQVHF						SSFSHYSGL
				LQFQFAEV		IIFETPLRV						GLAPQIHDL
				NNYVYAGL		VTIRLLETI						PGHLQEGFG
				SIYEASSL		IIYDRKFLM						TTFSYVNNM
				TIIIFHSL		YSYQSRFHL						SQEELIHQL
				VQQWFGNL		AAVSNLVRV						AQLAEYHKL
				LITGGTYA		RHYEDFPKL						SQLPLLSTI
				TAFSGPPM		TAYLFSRFV						SINPNNHAW
				SNLGYSEL		YTVENAKDI						VISDFITRL
				TVDDPYTT		TDFKDFVTL						GMLDTHHKL
				TVVNKDVF		QAVLNLHSI						AQNDIEHLF
				PEAFPALA		GIVDILHKL						TPSIYDDIN
				IGTIYGNL		HGVLNTDNM						KALQLLHDI
				NSYNYKNV		MDLQHGSLF						KQVIGTHEF
				SMVDVVML		NLAAAKHDL						YGQSNYSYP
				SSGDFPSL		ETIHVVHLI						FQFINPTTI
				VSYIFTYA		SGLAIAHVL						FHVQNIDLL
				ATLMYTYV		VGVKPVGSD						SQLPVDHIL
				SGYDFGYL		AQVRNQGYL						YSIVNASVL
				IQIMYQNL		SAALNKDFL						RFDDKYTLK
				SSVKFNPV		VNDTLRSEF						ISPRFDVQL
				VTFDYEEL		ISFDHSGKL						YQNQEIHNL
				TNYTFENV		KVMNILHRI						AGLENPITV
				ATPLYGNV		SQNTNVDKP						SGGVNLQSM
				ILEEAHEL		LSVLNHHFI						TQLSSKHEL
				TINEPILL		TEALPVKLI						ENVPSSVTD
				VITVFSVV		VMLENYQNL						KVIDTFHTL
				SDFDFPNL		WAQLNRDLI						IAVANAQEL
				VNVEFQGL		HQTALSHNL						TMAYNITPL
				KQFSYTHI		YSLSLQHTL						SMAENSIPL
				ATFEYSFI		VLLTHYHSL						KQNYVKHMF
				SDFSFQNM		EQQWVSHTF						QLLSHLHTL
				QNQEIHNL		TILEFSQNM						ATYIFLQTF
				EDYALEEL		AAMFNGNYM						QQLPGHLGF
				LQQYYVKL		QQPSNYGPM						RLLEASHAF
				ATNTYQQV		VALDFEQEM						DQIEYHEGL
				SMVVMENV		FMVEKGPTL						VNWDFVEQV
				VALVYNVL		YSEENGPLM						ALHTAIHTI
				SVSSFPKL		ASPEGQDYL						SVNSITHKL
				TITDFINI		SSYGQQSSF						FGPINSVAF
				AVLKFAAA		AAPLSGQTF						LSPANGEQI
				VNIQYLDL		ASVLNVNHI
				FAPIYADL		NMISVEHHF
				SSAQFLGL		ELFPVFTQL
				ISYSQPGL		STYGWTANM
				LSYSFAHL		YGIVNENSL
				IINSFQSI		FSVLNWDQV
				SGFEFTSV		ELLYMAHDL
				EDFEAPFL		MSPEEFDEM
				QQQSYVSL		SSYMHFTNV
				SIVGLSSL		TEFADFSTF
				QAYDFYYL		SQYGWSGNM
				LSWQFSSV		VIFTSETGM
				VNATFAAL		DMTVVEHQL
				AVQTFSYL		TQDHVMHLL
				MVMSFVNL		ASFSNGPVL
				VGIGYNGM		FAPVNVTTE
				VIVNMVDV		VGPEFDSMM
				IAMTYTGL		AAPISPWTM
				SFNLPSAL		SQGMNVTNM
				ASYIFTYA		SSPEDSGYM
				QSLEYTQI		YTVANKEYV
				ETFDFQAM		ITFSYVNNM
				LAPTFSNL		SQVINPTAI
				SAPLYVDI		IIGINGDYF
				ISLEGKPL		FSITDQQTL
				LAPTFSGL		AQLKTMHNL
				YQYSFPEL		ASFSAQTNM
				AIPEFMNL		FAHIDGDHL
				VTFEVTEL		FVNSNGYHL
				AALIYGKL		VVLSSVNSY
				STFTFADL		KLHDVEHVL
				QVFIFTGL		EQNYIPHVM
				AWLQVSPV		SSPSSTMTM
				IAYEFVEM		SGYAFTNYL
				ISFDPENL		EDLVFPSEI
				ADFGFSNL		SDFSDWSSF
				VLYVWAQL		ATFDFSQYM
				AVFTWTNL		QQYSFINQM
				TIVTVYNV		FSLVNGDDM
				IVYVMTGM		SQMGNLHAF
				TAATFQSV		ADFGFSNEF
				QAYDFPAI		SAVENLNEM
				TNLVYPAL		AQLQNQQSF
				TWQQGYGP		VAPTNPQAV
				SGFGYDHL		YAIPNPSFL
				SSPPYLIL		SAIFNFQSL
				ISYSFSHI		IQAENAEFM
				VALNFQTL		LIYTFTTTF
				ASQPYSSL		AMMAKAEYL
				EDFDSEQL		ISGWNGDNM
				VNYKYEDF		GDFGDWSAF
				AILSFTSL		SSLVNSQTL
				ALLSFTSL		TQLMNGTSM
				SVLAYATV		VIYPFMQGL
				TEEGNPLL		VLGQNAQTM
				EDGTFYEF		YQMEQDHNL
				SGPALSHL		EMLEAPHQL
				SSAIYMNL		IVGINLTEM
				SVINVSNL		FALVNGNNI
				GLFKGGDM		SQSMNFSLM
				VIFTANSL		FSSTNPTQV
				FQMAYSNL		TAVVNVTYM
				KNYEQPTI		AVQEFQNQM
				TTPTYGDL		ALIGVDHSL
				TSYFTSGL		QQYVFINQM
				ISLEYSEL		DLLGTLHNL
				NTHEFVNL		HSALIYSNL
				ALYQFSNL		DTHTNTYYL
				TITTFGSL		STTVNGDVF
				IGLVYSGM		VSPASYENV
				SSFFVNGL		SIYSPPAAA
				STIQAANL		TVPELTQQM
				AVPEFQGL		HSVQNTEYF
				QNYEMPNL		MAPQNLSTF
				SSTYFHQL		AMYVHAYTL
				SSIVFAEL		YAPINANAI
				QNFMYTML		FIMTNVDQI
				ITFIFKSL		NMPWNVDTL
				AVYQAAAL		AMGVNLTSM
				NMPWNVDT		EIYSFSESL
				VQQLYTTL		YQYTSPDFL
				TAFQFLQL		AQLGLGHSY
				SGHNLEYL		TQVIEPHDI
				SSFKAALL		ASIENTSTL
				IDYQYQLL		GSPMNTTQL
				SAPLFTGL		VAVSFAETV
				ETLHYQNL		ALSAVVHEY
				SIIKATNL		ASLVNADKL
				AILDFNNI		QQLDVEHNL
				STVLFHYL		GAYSATTTI
				SVADFGSL		DLLEQQHQL
				AVVDFEAL		FISDVEHQL
				STLTFAEL		STQQYGSNV
				HILAFYNL		FSVEGQENL
				TNINFPNL		LSGLNQEEL
				GQFQFTGI		TGLPYYTGV
				VGYAFDQV		VLNKTYHDL
				IAYLLTNL		YDYGGFTMM
				VQMKFRLL		AAGVGDMVM
				SSGMFPQL		GMMLVSHDF
				SSPEFSEL		VMVTNVTSL
				SVASFQEL		SNFGGGGSY
				VVDIFQTV		SVVDFNHNV
				IAVSFHYV		TQAISQETL
				SSYQPEFL		TSFVNFTDI
				SVLLVSNL		SAPSADAPM
				ASPEYSNL		SSIVNSIQV
				VAFSPGNL		VGFGGLEAM
				VAYEAPSL		SEIEYYAML
				ASGPYGNF		YQLDTGHYL
				SVLEYSEM		YAFYNTEQL
				SAYNVNNL		SQLIDTHLL
				SDYVYPSL		IQLMNTAHL
				SVVAFHNL		AMLGDFVNM
				ATYYFTTF		TSVIFVNNF
				YVYGYNSL		SIIEFQPTL
				VAIVYPLV		LMNFHDHTL
				IIQEFPEI		VQNATTHAI
				LAPDYDAL		SQPVNPHSL
				TGLKYPGM		YQPYNKDWI
				TWLVVTTL		QAVINGPNV
				VMPYLSQL		SQFQFSAQL
				VNQSFNAI		SDFEIGHFF
				VNQSFNAL		TQVEGGATL
				QTFVYSHV		TYSGLESQS
				SNYVFVFL		VVMALGDYM
				TAPLYSGV		AAPTNANSL
				QDFLFSQL		ITQEEYGEF
				VIQPFSSL		SAPASQANL
				SVVQVVNV		LAPTNLSSS
				TTGHLIYK		LNYAYTAQL
				INLIYGTI		IAYKFGKTV
				SSFVFSTV		AVLTNPETL
				QMEDGHTL		FGEEAEEEA
				TSYIFVSV		ISIANSNAI
				INYTNEKL		KSYNFHTGL
				IVELNTKL		VTIQNSELM
				EDGIGLFL		FSYSLGEAA
				IDYSFPSL		SQTYNAEYI
				SGLYFSNV		SNYHFYSSI
				SSQQFSGI		SSLEMTTTF
				VGPVYPIL		STYDFMSTL
				TIGTFPEL		SVATNIDEI
				YDFQHQEV		NQGTNVETI
				YDSVQPYF		QQLQQQHLL
				KVYTFNSV		SFSDYPPLG
				SNPEFAFL		SAMENLNEM
				ASYPFTTL		IGLAYVNHL
				LNYGFSGV		SAPNSPMAM
				QQFIYEKL		LMGSSQATM
				VMYGFKGV		ISPFFPNGV
				QVVSFPAL		STVVNADQI
				SIYPTAQL		SSGINGSFL
				SSVQMGAV		IAVANAQEL
				SSYAHGGL		VSPANSTTL
				VSNTFTAL		GGVVNMYHM
				TAPEYVFL		YLMEVAHDL
				SAYVVASM		ATYSYKEAL
				NTLVYHVV		ISPVNPVAI
				SGPAYAFM		SAYIFNSNV
				INVYFNAF		YSGSYNDYL
				VAVIFSGL		NSVINVSNL
				STVHYTAL		STVENFSQL
				EEMEFQRF		SGLLNQQSL
				ISPLFAEL		VALENANAV
				MVVGFANL		IQQVVNHGL
				IAWGYPNL		NGPQNIYNL
				EDSALQYM		VSVTNSMTV
				VVPEYVTL		TSLPYYTGV
				SSSAFSQL		YDVENGEFL
				LSYQFSTF		YMHANGASM
				VNIQYEVI		NQMEMEHSL
				VNKSYPSL		AQVQNSEQL
				INLSFNKL		AAFSVGTAM
				KEFEFSQL		VVVENGELI
				SMVTMAHL		GLMTTVHAI
				AVVNFSDV		YVLHNSNTM
				INVELSLL		STVSGAQEM
				SVLSYTSV		AAPTGTHVL
				IVLTFEYL		DQIEYHEGL
				SVEYTEKM		SAVGNDTQL
				SNLELHSL		TGVVNNNEM
				TDLEANQL		TLIVEPHVI
				SAVVFGAM		TGPDYYSQL
				EDEVKLAL		NSLSNSESL
				NTYAYGVM		VGVNNPVFL
				VTYVYQLI		SVLEVSHVF
				VYTVAPNV		SGIVNMDTP
				GLAYVNHL		FSQENTEKI
				ETFLFATV		SLLTNHVTL
				STFDHPEL		VAAINPELL
				VGYVLGQL		YQYTNSEVL
				LNEQVHSL		FQEENTENL
				NWPTYPQL		TGVVNAQAL
				YGGGGQYF		SSPENKNWL
				VNILYPVI		IVADFSASV
				LNYTYSQL		YLVVNPNYL
				VSPVLLQL		MSIENQEEL
				KALSYASL		SGLLNSQAL
				ANINFPNL		YSPEFKGQI
				SVYGFTGA		GGYGGGYDN
				IYFEVVNQ		YSSENQEAI
				LLGELHNL		EATYINHNF
				SAPTFINF		TAPYNYSYI
				VIPVYVGV		TTVTNPEPM
				EAPDYMYL		IFVGNVSAA
				EDYEIMQF		AALLNTDLV
				ATVSYANL		TNFGSTGQP
				TTYQMAVL		YAFNMKATV
				VIATFSLL		TPTETDTYA
				ETYKYFSL		SSEINSAYL
				VNLGFSSM		YTATNQDFI
				ASSSYPSM		LGPYPYATL
				VLDVLHSL		AGIYNTTEL
				EDDTAMYF		VNYGSPPSI
				LNQYYVYL		ITYGQFAQL
				LSYNFLQV		ISGVNGTHI
				ESLVYTTL		AQLAEYHKL
				AILTMTQL		SSPQFVGNL
				SGFNFGTL		EEFGDFQLV
				SSVAQPSL		AAPINTQGL
				SSYAFFVQ		NANTNTEVL
				MLSNTTAI		SMLINGYAL
				AGMIYTEM		AAPINPSDI
				VSVLVALL		SPYGGGYGS
				QSYKYNEL		IILIFQTGL
				EDTPQLYV		KILEEAHEL
				TNVLFNHL		ATFEKESVM
				ATYTFSGL		SPLTNQYYL
				SDYQMQQM		QGPFNNQEM
				STQIYQAV		IGGENGPVL
				VGIGFSNL		QSHLVIHNL
				AVLTFSEV		GSPENEEYI
				VGYVLTNV		TAGLNVGSL
				SDTQFPSL		YSPTGKEFV
				VAITYKEL		GSIANFTNV
				AAVTYNGV		VNIPQHANV
				YEYLFTNL		SSPVNPVVF
				NGYSFINI		TAVANNQAL
				QLLNTDYL		TIVDTGIGM
				AVVNVTYM		TLVDTGIGM
				LSLAFTNV		AVDFGNYHL
				VSVVFVNL		EDMTFAEQF
				SSFAFAGL		AAPVSSSFI
				TQQLYPSL		AMSSQLHSL
				TSVPFAAT		SSVSNVNLT
				AAYAYSAL		AGMGNAGSL
				SSFVFLNL		SSVVGVWYL
				KSYSYPSL		TGVVNGESL
				SGFSFGTV		FSLESQTTI
				TNIELATV		ASLTNNQNL
				SIASFVTL		IGPAGLGGL
				ATYTPGAL		SAVQNVADV
				ANVNIGSL		SGIIDSDFL
				LIGVDHSL		IAYLYNEGL
				TNVEYAHL		MQLEEKHQW
				VQQTFQGL		TDTILADEM
				EDTLMEYL		ESFSDYPPL
				GFDYKERL		AQGVSIEAM
				AAPLLPNM		VTIEYYSQL
				AVLNFTAL		IINENYDYL
				VTWGFPNL		KALINADEL
				SNFTFSHL		SSILKTSQL
				VNYRVPNM		AALENDKTI
				VTILFADL		SALANYIHL
				SIHSFQNL		SQVYNDAHI
				EGPIYEGL		ALIQNADTL
				SAPIFTVI		SQISNTEFL
				TGNTYTAV		SSVHTFPAL
				VAGMYPNL		VNYIKTSEV
				ATGPYPSM		ISPQFYATF
				VSPVYSAV		SNLVNENTL
				INWIYSSL		ASLDEYTLM
				ANYDMAQM		GQNPTEAEL
				TVLSGGTT		VSLLDIDHL
				LLTELHQL		SGLSGHTTL
				IAPSYAGI		SGPLEYPQL
				SSVTFTDV		VDQELTDGF
				AIVEFATV		EDLSGLTEM
				SILLYSTV		GFGGGGYGG
				SLIIYSTV		AQILNQVMM
				IIQEFPAL		AGYMYTQLM
				SNTLFTNV		VAPYNTTQF
				AGPEFVEV		SSPEGVETM
				IAPVFTAL		AILQVLHVL
				SSGFFPGL		FVTSNTQEL
				TVAQFNNV		TSYPPQTGS
				KVITFIDL		SQFPNAEKM
				SNYIFVSI		GGGYGGGSF
				KGYLFNTV		TALENLSTL
				NTFHYAGV		SQLPGTHEI
				AYEGRDYI		YSIGNGSVF
				ENFDYSSL		SAVVDFEAL
				ISPVNPVA		SALVGSSYI
				VLVSLTGL		IQPINHTTL
				GDNSHVEM		SSLINGSFL
				ANVVFTQL		AGQFNQDYL
				SVLSYESL		EQLDTHMEL
				NAYTYSSV		SVLFNLTTM
				SSPEYMLL		DLIQTIHEL
				VSQYYPKL		GGPINPATA
				ATFLYAEV		YALSDLDTL
				ANVQYAAV		SMGVNDIDI
				EDVVMVNV		YSGTAADFM
				RTYTYEKL		SSPLNSTQT
				TGTTVTNL		NMVAKVDEV
				DVYTFNAL		FGVSNPASA
				EDFYYTEM		GGPENVAEM
				MAPDYSMM		AAVWNAQEA
				TGFSYESL		GMIENGPFL
				STLLFSSL		YSIQGQSVM
				SVIVFGSI		AAPAGTTFV
				EAPLFSQL		INAEFVTQL
				AFYNLAQM		AQISNGQQL
				VIHRFLEL		ASLLDYDTV
				ANLIYYSL		SSGINVNAA
				SGPIFIVV		TIGFNVETV
				VTVVFSTV		FQSISTEFL
				SNPSYYQL		STVFNPSVL
				VISTAHSL		SMLGNYDEM
				SSPYFAAL		QLLTQEHVL
				IAIEPAQL		TLLNVYHAF
				SAYDWTSL		VVVDFSATW
				VNTIYDNA		EAIQNSTSI
				IVDPVSNL		VPPVNGVEI
				TIVEAAQL		YSGVNVTDL
				IHYGSGSL		VAASNIVQM
				VGPQVEEF		IVAAGVGEF
				TAINFSTV		VNAAFEMTL
				GVMIFVNV		AGIENDEAF
				ITAIFGQL		HQMQLVDSI
				NVITFNGL		SQLPVDHIL
				SSFSYLNL		VAPSFGTLL
				VSYVFTYA		IGVGYTQTL
				GVLEYANL		TTIEAIHGL
				TIVIMTSL		FGMGSMPNL
				TSFVPTNM		LAGQATTAY
				SWTTVTSM		EILEVLHSL
				VAVIYAGV		ALSEISHAL
				EAPGVYVF		EGIDFYTSI
				SVVNFTSL		SVLNVLHSL
				VNIVINNL		TSLLNGPML
				VTFPYPYM		VAIENPADV
				EQYIYPTI		SSVILQTLL
				TFQTGYTP		SSVLLQTLL
				ETVTYKNL		DQAIDYHEL
				VNFLVSLL		KTHINIVVI
				IAYAFFHL		DANPETHAF
				SDPEYINL		NAIANGNYP
				SSDKYAAL		MLLDVMHTI
				SSLTFNLV		QLDVEHNLF
				TIIEIINM		SILEDPPSI
				VAWQHTQL		SGGVNLQSM
				EDLIVSEL		SGVEGADVV
				VAPVASVL		SQLPLLSTI
				TGWGETQG		WASENQETL
				EDFSYEEL		SPEGSYVGQ
				SAPIFQDV		STVSNMANV
				SIQSFSAM		ASTTNQQEI
				EDTSFASL		SQIANTDTL
				INYSYINL		SGYPSYPAL
				VWLDAAAL		TAVISYDYL
				SGPTNEDL		YSGIPAVSF
				GLINKDSV		LEAQAATGF
				VAPSLSAL		GQLLPQHYL
				VAVSFPNV		QILSDFPKL
				YSPEYVSI		SAATNPNAM
				SLLIVTNL		SALANYDET
				STYASGPL		VAPLNLGMI
				SMILFTSL		SSFVNEATF
				SSLEFTEL		IGYFYGQGL
				ISFEYSTI		VMIPNVETI
				LQQTYSAL		VQYTFDLQL
				SIIKLTTL		AMWANEQAL
				NSPEFEQV		YSLTLVDAL
				INFTPSQL		VQIANPAFI
				TTYKVSSL		FAIEDAENA
				VVLNYESL		VGVVNPILA
				EDAIITGF		TSTSVDSID
				KIYVYWEV		VAYMNPIAM
				VNGEYATV		TAVEFSNQL
				SALKYYQL		SGPLDSTFI
				AVYTFETL		AAVENVSEL
				VALGFTSL		LDAAGVASL
				AVYAFLGL		NQHYNTSLL
				AAVAFQNL		SALSDADHM
				IAYEYSEL		SALAFGQGL
				VNNSMAQL		SALVGASEL
				AGYAYTDM		FSYLNPQEL
				TAPEFPEF		AGLGGLGGL
				VAFGYSNI		GAVLNDPYM
				GIENIHYL		GQLSNGEPH
				IGYEHEVL		GAIGNPEVL
				SPYMYYPL		NAGENSTSL
				TDFIQEEF		TTVEATHDL
				SSPVYIDL		TSATNGPSL
				SFVGLTNL		NVEIDPEIQ
				SIDQFANL		NVELDPEIQ
				SGLVFVQV		VGVVSVEFI
				TGLSFADL		FHVQNIDLL
				SAVQPLNI		QNFAFSGGL
				SAVQPLNL		TNISFTNMV
				ASFLYAEI		NQSDTSHLL
				IWLAAVKL		AAITALTDI
				ENYSFEEL		SILTFGTEA
				SNLLYVNV		IGPDVYAKL
				EGYDFSTV		SGPENFQVG
				VTAEFSYL		ISVGNGPAA
				ANYPNAGM		ADFEIGHFL
				TSPLFGTL		DGDNSHVEM
				TVYKASNL		SAVVDKDFL
				NQYKFILL		VAPSFLNSV
				SFIETSAL		YSLVNQQSF
				ADAVAVTM		GSIYNPEVL
				TSPEFTSV		EAVVNTQEL
				VIGVLHQL		SSPYSPAYL
				EPPVYANL		YAPVHADDL
				ATYESASL		GYNGYGGGP
				KTYETASL		VSPTGTHTL
				IGYTVGNL		ESPSDYSNL
				TNVDFPSL		MSPENQEYF
				IGYSAAEL		SSPKSTLTL
				TDEDAVLM		AVLEVVHEL
				TGPGLASL		GQLENAEQL
				ESPVALLL		ASHLNLDAL
				ALINADEL		YSLENEEAV
				ANVDFSHL		FSGSNAEQM
				ATYAAAVL		SSVLNLTEL
				LDDTQMAM		ASPANVGTL
				QNPVYAPL		ATYIFLQTF
				SAYLYQSL		TPLSTGGTL
				QNLAFTGL		QQYSFINQL
				PYTEFPEF		SAVKNDYEM
				EAPDYYEV		AAPSSPTTM
				ISDVEHQL		SGPALSTAL
				QLDVEHNL		VQVPNLESL
				VNNSFTVI		ATVSNGPFL
				MAPYYEAL		SSPANLNAM
				TGYQYPTM		NSPVNQPAM
				SSYIFSLV		STVSNMATV
				AVNSFSSL		YVVDNIDHL
				VTTQYGGL		SQAPTVHSL
				SSVQVYNL		STFSPALSL
				TALSFYHM		QTVLNPVTM
				VAYKVASL		INITNGEEV
				ASLEFGNL		TQSVNIEQL
				IHYGAGNM		SVVVNGIDL
				VGPFYFKL		PVNVTTEVK
				AAYIFGLG		TSNMNSSYI
				SIYSPPAA		VWIQKTSEM
				LSYQYSGL		GSYNDFGNY
				QVVNVQEL		SSPQNQEQI
				STPQYPAA		GGGGIGYEA
				TAAVFHEL		MAPENGYLM
				EVIDFSSL		TYGQPTDVS
				VSPTVSQL		AALVNLDSL
				SAVYFAGV		EQPNIVHDL
				SISASSGL		QGPQFVTGV
				VSDEYEQL		VQLENQMVL
				GTYKYLEV		VSITLENNY
				SRVSFTSL		QMAEQVHTL
				VSDSFANV		SALDNGPQI
				SALTFAGL		SQIVNPESI
				TAFEFGNA		SQMDEVDVF
				ISLDYHQL		GSLTGADTF
				TNVTFSKV		VDFGLSVKM
				EDLKLTEL		TDFGWEDAL
				TAVEFSYI		FSGHNLEYL
				VWIKPSGL		VQFTDIETL
				EDSIKDFF		ASAVSTDFM
				LATSFAQL		QSPLNQSSM
				ESPSYRTL		TGTTNPFLL
				ANLSVLNL		VSSINQEAL
				QNPNYYNL		FQNVNSVTL
				VDMLLQEM		SAIINEDNL
				TGPEFLVG		AMGVNMETA
				VGYGYEGT		NGIENDEEI
				VMQEVAQL		TAFGTGTGL
				SSLTFSNS		QTILNSTMM
				NVDHPINL		SAIGYIHSL
				AAYTFYAL		SAIGYLHSL
				VYNESTNL		SALGYLHSI
				TQNGVYSA		SALGYLHSL
				EDVDLPEV		VAVENTTSL
				SVISLASM		AAIQGAVAM
				VSPVYSYL		FGVGGLGGL
				VNFDFDGA		SAFQYGPTM
				SALFFAAV		SQEELIHQL
				ATKNPEEI		SLGLNTTNF
				FNLVFERL		ISSVNVDQV
				GLLKYSNL		FQGSNGTVL
				FSPEYAVL		GGVGNLDNL
				QNAVYINL		YSITNTEEL
				SSITFPAV		TAYEWVNPA
				DAAGVASL		IAGTGANVI
				ASYNHPVL		SQFDFSTGV
				TGYGGGFN		SLISNGPSL
				VSVSALTL		IIYNPYAAL
				ISEQFTAM		QQQQQQHLI
				VFVDLASI		QQQQQQHLL
				VNYENTMI		SSAQFLGLL
				SASHFSQL		IAFQYSTSL
				VNIKLNQL		ANVSNFTFA
				VSPVPALL		QALEQLHYV
				LIYDFANF		IAPSFVKGF
				SSFTPGFL		ISYDYLTSL
				STTVFHSL		SSMTNSTAA
				SAVVMSYL		SSPSSPTAL
				TSVESSNL		TPEENPPSW
				SIEHQELM		IAYAYTGNL
				SSIVNSIQ		AAIVTGAVV
				FTPSFANL		ITPPGYSHV
				SAESFVNV		YAPELLYYA
				YSLEYGFL		FGPINSVAF
				EGYIYIYV		SALVSSLHL
				SIITLYTL		SIYDAFPKV
				VAPEYQLV		SLYDAFPKV
				SLVNQEVL		SNWPTYPQL
				SLVELTSL		EALSIAHAL
				VSYKNPSL		SVYQKTNAI
				SAPEYVFL		ATIINEEVL
				YQTAVVEI		SAPVNFISA
				ASFSFSGL		AMNVNDSVT
				SAYLFVKL		SAIIFETPL
				VAYQPAGL		AALLNQQFL
				SSPLITVF		ISLKNSQEI
				VLIEFSLL		QSMGLVHEI
				VALQFTGL		GSSPKFSEI
				SSLSNPNL		SVFIFPPNI
				AVVELVTV		VNFEFPEFQ
				TDVIVDPM		SSVTGLTNI
				TNYKFFML		EDNPFAEYM
				VIIGKIAL		KMLDHPHII
				QSPEYENL		VISLEGKPL
				SSDVFPLL		GGGPGGGNF
				NPTNHLLF		EQILEHESI
				SPINVTTV		YSIAGGEYL
				SVTGFTAL		SMTLAIHEI
				VAVVFTAL		YMGTNIHSL
				KGFTFSAL		TMLVIAHRL
				VWLAAALL		SSTTNIDDL
				SAYVFASP		AALQNLEQL
				NGYSYPVV		AQLANTTAI
				SIGDFGNL		YSIIDDATM
				VSFSYAGL		VAPQSQELL
				APQNLSTF		VSAGIQTSF
				EGPFYPTL		VINELIGNL
				KILVFVAV		AALVNPDSF
				TIFAPPNI		SGPQLNAQL
				AIETVHNL		GAFSNPETL
				TGYGYANV		VAPSSVVEL
				VLFYYSNL		SSPSNPAAL
				SGPPVKNV		SSLTDSSSL
				VSVAYSSL		VSVANVDLL
				EDNPQTLL		KMLEVFHAI
				ATGPQPSL		LSLPNTDYI
				EDVVVPTM		STITNPSAI
				SQYDFIDL		TGEDVTPEN
				VVVLVVNV		TQWSGTGGP
				EQPTLPVL		SAPKYIDYL
				SSYPVALI		NSTENSFTL
				SWVPAVGL		GAGISGDYI
				TDSSGELM		YSASNNSTI
				VGFSNGSL		ESPINVTTV
				EDLYFTYL		SGPPVSELI
				QLPGLHEF		AMYIFLHTV
				SNFISPNM		GSVVNSVAL
				TGLGTGFG		EDNPQTLLF
				SSDSFTHL		IGFDEYMNL
				VSGIFPGL		FVYENPVSL
				ATYEAGAL		VSVGNVGQL
				SGPVVAMV		SSPVLQTSL
				SAFFFGAL		MGLENGTSA
				INYDFPTS		ASTQTTHEL
				SSEVFPAL		SLLANGHDL
				SNVNIGNL		TSPINPQHM
				SVSSFTSL		TSVVLLTEM
				AGPGFINV		SAVWNSPPL
				KAVDFTTV		TEFGTYAGA
				QNDIEHLF		ATYIFNGLT
				YNPDFSSL		SSVQNGIML
				GMGSMPNL		VSPLNVTAV
				SMVATVTV		ASYVNLPTI
				QAPELANV		VMLENYSNL
				ADYEATTF		VAPDLYAEL
				IEESAIDE		AMLTNLESL
				SSMVVSSL		IGLQNGVLL
				GGYGYGYG		TGPENPWLV
				IAFGFHQL		TAPDYGQGM
				VWIVTSEM		SALKSVTSA
				EDVPMILV		VGLTNYAAA
				EDYSFTAY		YQSMNSQYL
				QGPDYVLV		AIMPNGDHI
				QSISFSGL		SQVLNFEEI
				GPDVYAKL		TDNFIESSF
				SLVNADKL		FQQTATTTM
				VSYTVTTV		EDYKLLENM
				VGGPFPQL		SGGVGQAAI
				MITDVQLA		SSPTSTEYI
				SAYGALSL		YAPSSSSNL
				ISPSLVNV		SQHVNLDQL
				TAFGYKGL		VSYPHLVLL
				VISDFYQL		LQIPIPHSL
				KVMPFANL		ASPPLITNV
				ATLVVAQL		VAQSNAAFI
				SLSSLSNL		YSPFGDSPL
				SNLQYSLL		AVVVNAAQL
				SMLSPAAL		SLPSEIHDL
				FIVEFATL		IGYPFLVSV
				EDGVTPFM		ASVSNPLFL
				SGPVLPSL		TNYIYSISV
				AVTDFNNL		QLSDTLHSL
				SSLQYEML		YAAQATTPM
				STYVLSNL		IIEENFPNI
				ALENTTSI		IANINQELI
				SSPASTPL		AALENPMLL
				VNSEFTTL		TGVEYFNTF
				TPYEPQPT		AALAIVHLL
				IGVGLINV		FAIQNPTLI
				TAPHYQLL		IGPKNYEFL
				SSLVAASL		SAVKNLQQL
				GPVNHEEL		LINQNSDYL
				GTYVFTIV		NAIANASTL
				SSPPLPVL		SGDAAIVDM
				YNLEYSVV		ALLPQNHKL
				IVNDFAYM		SIYTPLANI
				TDEDGWTT		HAIENIDTF
				SSPVFKAM		QLIPNDHSL
				TTPQFPDM		YQLENIQVL
				YGGGNYGP		SLLSVSHAL
				SMVVSSLL		SGLQNFEAL
				GVANVEHI		GGGGSYNDF
				SIIEYYNI		GGNINVETI
				GVYEAAKL		GAVQNIAHL
				KTYQHFTL		SQVEQQELI
				YSYIYTVV		SSFYPSLTV
				KVQEFEHV		KLITNGSYI
				NVVYYVGE		VDVTNTTFL
				SSVILQTL		VALGNMYEL
				SSVLLQTL		ASMINVEYL
				KSYEFEDL		SSPGNPAFL
				SVIVVSTV		EQSPLSHDL
				GGMIYTGI		KALANVATV
				GGMIYTGL		AAPGLIGNM
				KSFIYPSL		YGIVSGDLI
				KSFLYPSL		IAPEDQVVL
				ESEVFYEL		AAPESFEEL
				SGYLVANV		QLIDLDHKL
				HNVSFSNL		TAVPYFSNL
				ESPIVVVL		SGGYGGGYG
				VAVQFADL		GKNPTDEYL
				ENYDFPVV		KAPLNIAVM
				VNVTTEVK		SSANNPNLM
				SVLNVNHI		SSATGSDVI
				MGYSYSLL		AVVLNATWL
				GNIVYSGL		ISPEYFQSV
				SGLLFTHL		ALMSNSTLA
				STFIYNSI		LSLENIATL
				IESFVADI		TVISLLTGL
				PTEEESPV		IVSVNGTTI
				SATTFINL		TSPSAYAGL
				ITAKFTAL		VALLNLENM
				TDTTILQV		SVVINAELA
				TSANFPAL		VVLGAWPSL
				ALLPGVAL		ATVTNPTTT
				SSPAYPSL		SAGGFGFGS
				ESADMYFM		SALGSTGPL
				SSTLFSAL		TSPVNPAVF
				EDYGQQSF		AVYQFGSAL
				ASYTYLSL		EVIPLGSQE
				GFEKFFEV		TALSPYASL
				VNLPAAQL		SGLLNPYSL
				VDIILPQI		VIVNNTESI
				LISLFTAN		SMGLSLVEM
				VTWLFTSV		AMLAVLHTV
				ASGVAVSD		NQVDSIHAL
				AQLLYTTV		AALANLDNI
				SIAELKSL		SGPGFWSGL
				EDHTYEGL		TVGFNVETV
				IQYIFPNA		VAPESIEEL
				ESIEFIQV		LAPTLLTAM
				TGPGILSM		AGFAFLTGV
				TGPGLLSM		SGIENVNSV
				VTAAFPAL		EDVKMITGL
				EDFVSPEL		TISSNLTEM
				VALDMTTL		LVIFNQEVI
				KSFSYSSL		SSPQKVDVL
				VAVLFPTL		YSIVNASVL
				SSIEYSDL		ALKPGAAVT
				LNGLTHTL		IQILNSATV
				SAVEYGLL		SIWLFQANL
				ADAFGDEL		TGYIYSTDL
				SGASFSSL		VAPDLGVLL
				YNPTYETM		VAPSLSALI
				EEMELYEL		NTHENLTYL
				GNIVFVTL		GKNPTDAYL
				IGFGYPAY		SLLNAVHSF
				IAYLYDRL		IQPDNIVYV
				VNYISAVL		AVVEFLTSV
				VSPYFVAL		SAPQSAVEL
				GNYSFYVL		TAVPFVNGV
				EDAEVYEL		INVPNAEVL
				SSYDYGEL		VGPQFQADL
				VSPEFHTL		AALNNHVEV
				ELQTLHNL		GQVINLDQL
				AGVKFTGL		VGLAAGAGL
				PVNVTTEV		SALLSGVAL
				VWLEAARL		STPVNVTSL
				ESPGIDYV		NQQALSHSI
				SWIAVSAL		VAVPLIGKL
				QALVYPVL		SGNFNVDNI
				SVYVYKLG		TPEPAMPSG
				AVVVFVGV		QDFQYADGL
				RSPEYLSL		SSAPSWPSL
				SIPVFSPL		GVYEFTQDV
				TMKDDLAD		EDFQQSLEL
				SPTGTHTL		LAYENVKEV
				VYYEVIQL		YAIQLITAA
				EDSETLQF		VAPTFSPNL
				SSLYAQLC		TSAYNTEVL
				LNDLIHNI		STIQNADLI
				TSPVFILL		AAILGIAGG
				SGWGELSA		QSLTVIHDF
				ASYLLAAL		NAVSGQESL
				SPDAFVQI		VGPSGAQFL
				ILLYYTTV		AATFNPELI
				SVVEIASL		GAPLNLVDL
				TSIDYNPL		TGPGNQDSL
				QDFEMPTV		SAPVMLTVL
				VGDIFANV		KAYIFEGAL
				VGISYISV		SSYENPWTI
				NNYVYLVL		FGATNWDLI
				SSLHFSFL		SIISNTEAV
				SSPAFINV		LSIENAEEI
				SSPTMPQL		EDLDGFQEL
				SSPLFGSL		IMVGVIHSL
				YTEDQVVS		VSTSNVSSL
				LSYQSSNL		GGGINVQEI
				VNGSYEAL		ELMRYAHDL
				ESPDFPYL		VGPGFDAAL
				VALAFVGL		GTVTNVEEA
				AEYIYPSL		AALQNAVAF
				AADTFTAL		GIVTNWDDM
				VTPNLPNL		TALVSGDAL
				FLVAVATL		SGLVNQSNM
				FSLSFCGS		IQIANVTTL
				SGFAFQSV		ATLENVTNL
				FISPESGF		ISSGDFPSL
				LAPAYALL		SSPANISSL
				IQVQYVQL		LDYFGEEAF
				ALLNGEYL		TGYLNTVTV
				SITSFPRL		SALEFLTHL
				VDEVSSLL		TSIPNFSYM
				QGPAYSHL		SYIQVTSPM
				SSPVAISL		EDLDGMEGF
				LLAAALTM		VSPANAAQI
				TSVVFSSI		ATVENLNEL
				SGPGYPLV		SAIIDSDNV
				IITTLENL		VSVGGATFM
				SIYSMTAI		KMSSSDTPL
				VSPVLVTL		AGLENPITV
				ALSIAHAL		EGLAALHSL
				VTYLYNTL		ESFPGFVNL
				LDTEIEYM		GALAVFPSI
				VDFGNYHL		GALAVFPSL
				SAIDLINI		SKGPAVGID
				IFYTPQYL		GQVQGADVL
				TIIKPFNL		AAVQNPALT
				KTLVLSNL		SSSLNAEAI
				SGPPISGF		YAADNQIYI
				VGYTSLVL		TSAQNVEFL
				EGLPEPIT		SALTAAVTM
				EGLPEPLT		SVASNISFI
				KTWSYTYL		KGPSNVFKI
				LGYAYVNF		QLLEVQHHL
				LNITYPML		IILNYSTGL
				SDVVFATM		VSTDFMSNL
				SAFQVGHL		YTLHNIDQL
				TSTQTMGP		NGYVYSVSM
				VNQTYYVL		NSLLNNMEL
				EDQPGPYL		SAPTLAETM
				ESLRYKLL		AAPTSAAAL
				STYTFMMV		GASLLFLNI
				TAPDYFLL		ATFEFTANV
				QTLTFYEL		SYGAFTNQI
				GGPDFSNL		AAPMSNMAM
				AVPYFSNL		SQYPFAVTL
				IAPGYHSI		FQALNAEKL
				SDYPPLGR		SMPISEETL
				INYQPPTV		NALLNSENL
				INLIYGTM		ISIMNGSSV
				VDYVFTAM		TGYPFQCLG
				VTYLFVQL		ANIDFYAQV
				YTGYFCDL		GASVNNTTL
				SSPEIIEF		AGIKNSTEF
				STGGYNQP		ASLENQLEA
				ADTTILFV		WSPTNLAYF
				AAMAFTYL		GNYGGGGNY
				ASFSFTGL		VDHNIADYM
				SGYGTSLL		TQAPAVATT
				SSDLFNNL		SGSLNAQVI
				SSFNFGGP		SGSLNAQVL
				ATLTYDTL		IAGPLIATA
				SIAAFSSI		YQVVNSYPL
				TSTAFTGL		AAMQDPEVM
				SMVQVANI		DAIHNFDFL
				SNATYVEV		SGPPSGTGL
				AAFDFTSM		AIVEHLVTL
				SAAIYHVL		NSLTNIQWL
				SYYNSPGL		WSMENLEEI
				YSYSYLGL		AASTNGSSI
				AIENIDTL		AALANATVI
				GVYAFGFL		IVGSNLDAL
				SGPEFTLL		ISLTGGSVV
				STGWYPAL		QLLEFMHQL
				AGYDYLAL		AMGTSTVEI
				KAYIHTRM		VGSLNLEEL
				SSYIVSQI		IGFSYSVNL
				SGVNGTHI		TTYYFEGGL
				VSAVYTVL		FSELNSTEM
				SSYDFTSI		TMAYNITPL
				QNVAYEYL		VAYEFMSQA
				TPSIPVLT		AQSINITEL
				VFYALPVV		TTYAFFNTF
				NVQSYSSL		TGEVAGSGF
				DFSVFSNL		VGEPSSSGL
				IVNEYTTL		YQGQNAWFL
				ISGSATNL		VNQDYFASV
				SGVSLAAL		LASSASAEF
				TGYDYGYV		VAHTFVIGV
				EDFIYENV		GGYGGGYGG
				SSPGYSHL		ASWTPYPSL
				YDYVLPQV		AAATGATSL
				GAPGFINL		TGPPNTSYM
				ISGPLSPM		AAPPSFGTL
				IAYIMPGL		ASPELTSPL
				TVLAMSNL		GLSPEIHTL
				SQPILLEL		ISPRFDVQL
				TDINLPYL		YSGANSIFL
				LQAGNVVL		LSVTNSEEL
				EDVLIQNI		EGFADFSQM
				STLVFSLI		VAVSFPNVV
				VALLFTGI		VNYDYSTLI
				SDTLLATL		FAHTNIESL
				TSLKYDQL		GAPSNPDVF
				EAFSFDYM		SAPNNITVL
				IQIGYSVL		SAPTAAAVV
				ADAVTYQL		SQFKFLQRL
				VAAPFGML		GALVNTSDL
				ANYEFSQV		YGQSNYSYP
				AVLSSGGL		AGMPGYPVL
				VSVAVVNL		LVDSGAQVS
				STFTLANV		AGIYNLDDL
				VSVVLSSL		GSIVNEGYL
				KGYIFLTL		TGPNNTTNF
				SGYMTPGL		YGNVNVATL
				IGPVLVSV		NAPNNNANL
				SYYGPLNL		QALLNGLEL
				VFYQTPGL		TAPVNIAVI
				SLPLPPPL		VAAVFIAQL
				YLNGYIYI		TTVTNSTPL
				EDTFIADL		FQGETFDYI
				YNYIYIEI		SSGVASDTI
				VTGFFASM		YALSNAIGP
				EDSMMEYL		AAATGATPI
				TITSFTGL		SQSTGLPTL
				ISTSFPNL		YMPANGETV
				SSVGFSVL		GALKNLSVI
				LGPQYLAL		VSNNNSGFL
				SSVPMLNV		GAPINVMFL
				VAIGLVNL		IGPFNNIDI
				GSNFPEHI		AIYESLQSM
				SQVRFSNI		VSPENIIFT
				YNLDYTEL		AAPDLSTNL
				VSQSFSYL		AIYYFKIAV
				FLNNQEYV		YGVSGYPTL
				VDEVVDIM		AAPVSLAGL
				QSFGAVNL		YAVGNHDFI
				SSPTVALL		FGGGGYGGF
[truncated: 207 more rows]
