# Supplementary material
Source: HighWire-hosted journal article supplement (https://jitc.bmj.com/content/13/4/e010673)
Supplement: inline-supplementary-material-5 [file inline-supplementary-material-5.xlsx]

## Sheet: S3-pie-octamer H2Kb-5T33
		%	number of peptides
	SB	73.5672	1489
	WB	9.14032	185
	NB	17.2925	350
%
#REF!
#REF!
#REF!
#REF!
