# Supplementary material
Source: HighWire-hosted journal article supplement (https://jitc.bmj.com/content/13/4/e010673)
Supplement: inline-supplementary-material-6 [file inline-supplementary-material-6.xlsx]

## Sheet: S4 -pie - nonamer - H2Db - 5T33
	%	number of peptides
SB	94.6573	939
WB	2.92339	29
NB	2.41935	24
