# Supplementary material
Source: HighWire-hosted journal article supplement (https://jitc.bmj.com/content/13/4/e010673)
Supplement: inline-supplementary-material-7 [file inline-supplementary-material-7.xlsx]

## Sheet: S5 - Best GIBBS cluster - 5TGM1
Octamer H2Kb	trash - octamer - (not used)	nonamer H2Kb - 5TGM1 - (not used)	nonamer H2Db - 5TGM1	nonamer Qa-2 - 5TGM1	trash - nonamer
SSVKFNPV	SAMGAAYG	TTFSYVNNM	FQNVNSVTL	DLLEQQHQL	SVETSEGFL
SSIIFEDI	GQNRIHLE	VVYIYKEHF	MSIENQEEL	KQNYVKHMF	AQSFSGDFT
AALDFKNV	PDDVIALD	IGYPFLVSV	AAVWNAQEA	AQNKYEREL	TLEENGAGD
SGYDFSRL	LTIDNGVF	ESYSFEARM	VAVVNKVDI	QLSQVLHRL	YQQPPFTQN
VGPRYTNL	TYGQQPTA	ESFSDYPPL	SQLSTHDPL	YLMEVAHDL	TASAAPPQT
VNIYYETM	LMAPQPGV	ATYIFLQTF	SSPANLNAM	SVNSITHKL	EDVVATGAD
TSTTFTNV	NALANPLY	STYDFMSTL	AALENTHLL	QSLELVHRF	TQPGQGYSQ
VAFDFTKV	SSFQGIVD	AVLSFSTRL	AGQFNQDYL	NLNGTLHEL	DVANKIGII
IDYEFSAL	EIHRELNA	VNMEKYPDL	SGLVNHVPL	SLLSVSHAL	GYNGYGGGP
VIYPMAVV	GGYGYGYG	AGFAFLTGV	SMAENSIPL	KAIETVHNL	DGMGVSTVT
TNYNFQYI	YGGGNYGP	VNIRFIGGL	SMVQNRVFL	NMISVEHHF	SHEKSFLVS
VALQFTGL	HDFRSPPP	LSPSHYALL	LSVTNSEEL	FISDVEHQL	ENVPSSVTD
IALRYVAL	SPDASTLE	QGPQFVTGV	AALQNLVKI	QLLSHLHTL	DVAYKNALA
STIHFYNL	DPEDKVIL	KNHEFIATF	SGLLNMTKI	TLNSFIHVL	SFGGGSFGG
SAVVYAQL	TSTPTVSS	IGPTYYQRL	SVTVQKEYS	SGLAHLHSL	DFQGSTMLT
VSYLFSHV	HTAVVPLD	QSIAFISRL	QQPSNYGPM	ASIDILHSI	YEPEISRLH
VRYSHEKL	EGAQYLMQ	VTFERVEQM	SSPANISSL	DMTHTIHKL	NQQPSNYGP
ITFIFKSL	SFGGGSFG	QQYSFINQM	ASMINVEYL	DLHAVKHDL	AAILGIAGG
SGYDMPYA	GGYGGFQT	SSFQFHNRM	NAIANASTL	QQQQQQHLL	SGGYGGGYG
VGPMYSYV	QVTQPTVG	SSAQFLGLL	GSVLNASTV	NQADTTHPL	SVAGVLTNK
TILEFAQL	DMKTKYFF	SIYDAFPKV	AVLTNPETL	RVAPEEHPV	GGSFGGGSF
QVYGFLEV	SGASTGIY	VSSNSALQF	VAVRNLQEI	NQSDTSHLL	TPLSTGGTL
KIITYRNL	GSNFPEHI	ADFGFSNEF	AAPSSPTTM	EQPNIVHDL	APVHADDLR
VADKFTEL	WSMTSDIF	KNYDFAQVL	YSIVNASVL	KTNVIQHDL	DVALPALLD
SVHTFPAL	LVPHQMAH	ATYTFIQQL	AALQNAVAF	IIEPSLRQL	MKTSRAFFS
SYNDFGNY	GVGDDQIG	VAPSFGTLL	TSNMNSSYI	SELQVLHDI	FGGSTGGFG
SSPLYTTL	SVAGVLTN	VNYRHLALL	SAVVDKDFL	RVAEFTTNL	HSQGLGGHY
VQFLYREL	ISTPEELG	TSYRFTTEL	SSEINSAYL	YQNQEIHNL	SHPREPTLG
ITYYFDNV	SYHTDGFN	VNQERFPNV	SSPVNPVVF	EVLRVTHEL	EIHKDLLVT
SNYVFVFL	DESGPSIV	SIAAFIQRL	FGLSNQLVV	SMMDVDHQI	TGIGGHKAP
VLDVLHSL	NYRTQLYD	VSVEYTEKM	AAPTNANSL	GSIEGRHDL	NAQHDPLLT
VALAFRHL	AVDPPKAD	SGPLEYPQL	SMGVNDIDI	VMNSVFRQM	YVTGPGGVD
SSPKFSEL	GFGGNDNF	TSVIFVNNF	FAIQNPTLI	DSLATERKI	ADNLVLNLQ
KNFKFHAL	GIQKELQF	ANFPRATGL	FQFINPTTI	GASLLFLNI	HPLGADSQV
STFIYNSM	ALDDFVLG	SNYAFLYGV	FQIVNPHLL	VSHSQLHDF	ITSMTRVIE
VVYPFPTF	EPPVQESV	VTYHGFPNL	SAPVNFISA	RLLEASHAF	GVRNPQQHL
SSYQHTSV	NYDAPVGV	VNYDYSTLI	FGPINSVAF	DQQESLHKL	GQPADDIFE
IQQQYAQV	YLGPDEND	SSFSHYSGL	SSIVNSIQV	DVINVFHRL	GGYGGGYGS
QALKYFNL	FTTSATDY	ASPDASTLE	SAVQNVADV	IQQVVNHGL	ESNIQPIFA
IWIRVASL	TDEQIVQQ	KIFEFKETL	STITNPSAI	KQMEDGHTL	NAAGFNKLG
TGYNFQRV	GFEIPDID	TILEFSQNM	LSIENAEEI	AQHGRFLEI	LAVGGAVLG
VNIAVTNV	EEGPPSYY	KNFKFLGTL	AAGVGDMVM	SQDENYHHL	LTEAPLNPK
YGYHFPEL	AIMFVGVN	IAYLYNEGL	YSIVGLSSL	KQVIGTHEF	KELGLETYK
KSFLYPSL	FGGGGGNF	NDFGNYSGQ	YQPYNKDWI	SLHSQVHQI	GVQQDTILA
SSLLYPLI	GFGDGYNG	IGLAYVNHL	ASTTNQQEI	ILMEHIHKL	SGEELPTTS
ASYEFTTL	AFDMEDLG	ISPFFPNGV	YMPQNPHII	HSALIYSNL	VAGYAAQLE
TILSFTNL	EDEPTDLA	SSPQFVGNL	SGVGNYISA	AMHSLPHVI	TSQLPLESD
VNYDYSTL	LPHSLPQQ	KSYSFIARM	AAIQGAVAM	QLLEVQHHL	YGGYGGYGA
KVVEFSEL	EDVKLLGM	VNVERVLNV	AAMKNVTEL	QQIDYARQL	TGEVAGSGF
QVVSFPAL	NAAPGVDL	INYDYVHEL	AAITNKYQL	DANPETHAF	QEDGPVVIG
TSYIFVSV	QNDPVEIK	SAYQRGESL	GQVINLDQL	SLVDLNTRL	TEEGNPLLK
SVFQFGSS	SEGRFTFT	VAFDRHLYV	GAIVNGKVL	QQLQQQHLL	SKDNFHGLA
VNYDFGHM	WLPVQDLG	SSANNPNLM	SQMTNLQEL	MQIDFIHQL	GNYGGGGNY
AGPTFNYL	TGPGLLSM	TDFGWEDAL	YTLRNQDTF	EIIKDIHNL	ASSGVTVSA
AVYSFEAL	EGLPEPLT	VAYMNPIAM	TGVVNGESL	RIIENLHDV	EFSGGGLLL
ASPIFTHV	TYGQPSSY	FAYEGRDYI	YAPINANAI	LISDVEHHL	ALSGAGALG
GNYSFYVL	AVVFTARY	VGFDYKERL	AGPTNVHLI	EQSDLVHRI	AYSSPSIVL
FSQEYINL	KSIAKFFD	AVVAFVMKM	KALANVATV	QVLELQHTL	AKSIDFPLT
ASQPYSSL	AITSINDS	SLYDAFPKV	FAPNSVHYL	AQNSSLREL	IKQLNRQLD
QIIPFKTL	DTEFVRFD	VITNFSARI	SAPQSAVEL	SMDPYPHQF	VSLGKLVLT
SAARFALL	EDLLLQDF	TNPSFDGRL	IAVTNVQEL	KIYQWINEL	GPPGPAGPA
LQYIFAHV	NKRIVLFD	EIYSFSESL	QNPTNAEVL	EQNHLLHLV	SGFGQGFSD
SNLKYILV	TSLVPFVD	STYGWTANM	AAGDGDVKL	KESTLHLVL	YGGGPGYSS
GVLEYANL	YMVGPIEE	IAYKFGKTV	AALVNLDSL	QVNQLQHEL	TSYPPQTGS
SIIKATNL	IEESPIDE	VAYWRQAGL	SGIRNISFM	DLIQTIHEL	TSFGTEASN
SAFEFNEL	FKGPHLVQ	SGYAFTNYL	FGPVNHEEL	YQMEQDHNL	GGNYGSGSY
TSPEYQKL	MVPVTVVF	ATYSYKEAL	AVITNAFVI	SQTPQLHFL	SFGGAGFGG
STYSVAKM	KNLYRQLI	ISPRFDVQL	SAVENLNEM	KVSDILHSI	LPIGQHIYL
FSPEYAVL	IEESAIDE	LNVPASVRF	LQLLNTDYL	KFLEQVHQL	TEFGTYAGA
VSQYYPKL	FVQDLTDE	AVYQFGSAL	LSVWNQQVL	SALGYLHSL	TPGYVGFAN
VTYVYQLI	ASGVAVSD	GTFQRSAGL	IAVANATTM	RVLDQPHSL	ERIEPSPYK
STIEFKNM	SGDGYNGF	SAYIFNSNV	YSITNTEEL	IQLEANHVI	RFDDKYTLK
VALLFTGI	YVEDGVYS	FYPADITLT	ASPANVGTL	NVISVDHHI	ALKPGAAVT
TTYQMAVL	LPSTPGLG	SLILFSTRL	IAPTNAEVL	DVINVFHHL	IASNAGSIA
VGPRYTQL	AGPAPVFA	VNYYFERNM	FSNVNLKEV	ELVPHLHNL	TYGPPQPWG
SFYGSSSL	AAVDDLQF	AGPSRTVGL	VALINKDFL	GMMLVSHDF	TPANLVVGP
VGGPFPQL	ALLSTGSK	INAEFVTQL	GGGGNYNDF	LQIPIPHSL	SFSDYPPLG
AWLQVSPV	PRPPPKPM	SNFVFARTM	HSVQNTEYF	EALSIAHAL	TSDDVVVVG
VSTKFEHL	RPVIVAYK	VIFTSETGM	ASLTNNQNL	FFSVLLHRV	SGFNGGFGS
SAFSFRTL	SSGINVNA	LAYENVKEV	GAVTNVKVI	DLLGTLHNL	NVELDPEIQ
VINVFHHL	SSIERMGP	ITYGQFAQL	SQHVNLDQL	LQLGIPHSF	PGHLQEGFG
VFTEVANL	DSAGHILY	SALAFGQGL	GKNPTDEYL	EQDKLLHFF	GPYGGGGQY
TAPEYVFL	YTEDQVVS	KTYQFLNDI	VQVPNLESL	RILPSIHQL	QERQQDILR
VSYVFTEV	LNPLPLAT	VTIEYYSQL	FSVTNPHTM	QQLDVEHNL	AGLNRVKVS
SAIAFSNV	IEDGVVVG	GDYADFQYL	SQPVNPHSL	GQVVIIHML	NYAPLSRIG
SSYAYTKV	GDNPKLLL	VAYRHLVGV	AALVNPDSF	RAIDSIHQL	RVDQNELVS
ATRSFPQL	GPHSLRYF	VGYRFVTAI	VMLENYSHL	TLTNVIHNL	GFGGGGFGG
TSVRFTQL	GVNVSVNA	SSYRFVQNV	SSLQNHERI	ILNPHIHLM	SEELHYFVQ
VNYRHLAL	EDYNLYTF	SNYHFYSSI	VSILNRQVL	EMTEALHDL	TPSIYDDIN
SNVKYVML	SGPRTLVL	SVSYASTNL	TSLLNGPML	AQQVQIHQI	RDEKVQLYR
FAPIYADL	EDGPVVIG	IGPDVYAKL	YGIRNSLLI	EQLEVHHSL	VTDPRNILL
YNFQYISL	LASGTTLF	RVIDFVAQV	AALENDKTI	SQLNELHHL	ISAATGGLA
ATFLYAEV	MDVAASEF	TDFTNVTSL	VMVTNVTSL	PSEATLHSL	QGIVPAGLT
ISFEFRSL	DVAITELS	VNFKHEVSV	FSPFNPTSL	TQDQHLHNF	NGPGYKVVD
KILTFDQL	LTSEPQPQ	QSVDMKIGV	SILVNQEVL	EQNESAHTL	IGDLQAFVG
QGYEYDNL	DKYTLKLT	VNVDHPINL	STVFNPSVL	KILEEAHEL	FGGGSSGGF
VAVIFSGL	TAPVNIAG	ATVSNGPFL	ASVSNPLFL	NQMTEAHKL	TATFAQALQ
VNLQYSEV	SDGTVPFW	VAVTFSERL	GAIGNPEVL	ALLHLVHDF	GGGPGGGNF
VIISFNSL	VVESTGVF	VNVAKLRYM	GQIQNKEVL	SINPNNHAW	MEDLSSGLG
VSPVYSAV	QVAEQFLN	VAVPLIGKL	FAIDDHDYL	EQVALVHRL	NPDIKYPLR
INIHYTQL	SSYGGPAS	TNYRFKNLF	IGVVSKEYI	TANPQTHSF	SPEGSYVGQ
LNDLIHNI	EAVPKMYK	YNASGRLTL	GSLSNHTEL	HQTALSHNL	GGGYGGGSF
ATMLFAEL	SSEGLLGI	VISDFITRL	VGVNNPVFL	QILSDFPKL	YGGGYGGYD
LAYLFAQL	VPFPDTYE	SSYTFPKMM	YGIVNENSL	GALGTLHQL	GGYGGGYDN
KSYLFQLL	EDAVLEYL	VTYSFRQSF	AALNNHVEV	SVLNVLHSL	GGNFGGGNY
KNVVYRDL	YSLLDPSY	VNVNERLVQ	VGVVNPILA	GQMGTVHRI	VTDPRNLLL
VMYRVIQV	NDFGNYSG	INQIYEARV	SGLTNRDTL	VLSEIMHSF	EVIPLGSQE
SGPEFTLL	KEYDRLLE	LSYTRFSLA	TGPGNQDSL	AQLLHVHEI	ASNLPAGIS
VSFTYRYL	SDQDYILK	LIYTFTTTF	SAPASQANL	KVIDTFHTL	PAWDPMGAL
SNVVFKLL	MITDVQLA	SYGAFTNQI	VSSINQEAL	QLIDLDHKL	MAAFPKKQN
QSDLVHRI	FSDGYLAL	TTERFGQAA	SAPTAAAVV	AQHPGQHLI	GYGNQGGGY
HIYEFPQL	VEVTIADA	ATFEFTANV	RALINSQEL	ELSHVIRQL	AGLPESVIW
TQYTFSSI	ENEKLKLG	TGYSTPTAP	SAVWNSPPL	KSLITTHHL	TNVPTEGFQ
SAPLFTGL	STNLEWLH	VVYVFSTEM	TAPVNIAVI	SQEEIIHNI	DPDGKVVLS
VALKFSQI	TLTENYAA	LNYAYTAQL	FSGHNLEYL	AQHQQVRQI	MTNQKIRID
VGINYREV	SGSYNDFG	VILEYFTRL	RAIENIDTL	VLLSTIHEL	EGEEPTVYS
SSILYPLL	MPISGIIE	VNWDFVEQV	SGLLNQQSL	AVNMHFHDI	PRANPSAFL
EVYSFSGL	SSEGLLGL	ASFSNGPVL	TQIQNAQLM	DQNTATHLI	LASSASAEF
SSVQVYNL	VELAAGPF	SIYRFHAQF	TGTTNPFLL	KLIDDVHRL	EEGPPSYYD
VFRELPSL	TEVPGNFQ	IQYDRTLLV	AALQNLEQL	TQATTTHSI	ALQHSIRLS
VNDIFERI	AVLAPLIA	QVYTFTERM	SAATNPNAM	DQVPIQHEL	AKDVKFGAD
SNIQYRSL	SGDAAIVD	LNMNSAPTF	SQTYNAEYI	AQLSTIRSF	LVDSGAQVS
IAPSYAGI	GLTAQPEL	STWSVDRQL	SAIFNFQSL	VLTHIDHSL	SSEAPPLVN
FAYRFSNL	ASSAMVFS	QQYVFINQM	SAVKNLQQL	RAQDVPHSL	EAQDDSILK
VIVKFAQL	EPTYVKVK	LDAAGVASL	VGVVSVEFI	RQLISAHVL	SDGTVPFWA
VIVEFRDL	AKFIRNFA	ATFEKESVM	NALLNSENL	EVLTQEHRL	GGFGGGGFG
ISARFVQL	TKQEEFYA	VNYEFGIAL	YMGTNIHSL	EQDIVLHGL	KANPIQGFS
ATIRVTNL	GGGGYDGY	VNIDYTISF	RALSNLESI	EQMSIGHHI	LGIPPDDED
LQYEFTKL	LQVSNVLS	TTQHFMDIK	SQISNTEFL	AMAPRTLLL	GSSPKFSEI
TGNTYTAV	TADVGFID	IIQSIRMGM	QAIKNGQAL	SALGYLHSI	SPYGGGYGS
STPEFYQV	NLHDVAYK	SAIAFSNVF	SVLFNLTTM	EDYKFHHTF	DPEDKVILA
SFLDVRNL	DEINNPVL	LSYSYQSRF	NALENINVI	AGNKNFHNF	KEPFEDGFA
ISFKFDHL	SFSKAFGQ	VSYPHLVLL	ALIQNADTL	EQLFQEHRL	DPSVKSIYQ
SGFEFTSV	SEEQNLVT	TGYGTQSAP	AGIENDEAF	AMYIFLHTV	YGGGGQYFA
IAFIFNNL	EEVAELQG	SNQSSYGGP	VVVENGELI	SGLSHLHSL	IVAAGVGEF
VLYVWAQL	NYAYCQVV	IIQENFPKL	YALSDLDTL	RQLPSSHAL	EENEKLKLG
AIETVHNL	SEEQFGGD	TGPDYYSQL	STIQNADLI	AQNDIEHLF	SETAPAETA
YTGGFTNV	IDKAVAFQ	TNQDFIQRL	KTIYNVEHL	TQIRLEHEV	QQELDTVVK
QNYEMPNL	LQAGNVVL	DQYKRETIL	YAIPNPSFL	ALIGVDHSL	LVRPGTALE
SLLPSSNL	PEDKVILA	VAHTFVIGV	GAVQNIAHL	AVLEVVHEL	GVQDPRILM
QGPAYSHL	ITGLSTSA	ATVTNPTTT	GQLENAEQL	ESLKQLHGF	SQEALSPVH
SSFSYLNL	VHLDIQVG	VNLKEYPAL	TAPYNYSYI	QLNEQVHSL	TSGYGQSSY
TNYIFDSL	VNVDKVLE	SNYEFHNRV	SAPTLAETM	EQNYIPHVM	LGVSHSVLK
VNVYYTTM	TSTQTMGP	EDFEHKYNF	VALENANAV	GQVTFLHVF	GDNPKLLLK
SRYLHAHL	YGAYPTQP	KAYSFKEQI	TGVTNRDLI	EVNTVLHGF	TDAPQPDVK
LTGIKHEL	VVALGAEY	VVLSSVNSY	LAIRNDEEL	RQLETVREL	LPPLGGGLG
SGLKYVAV	ETLPEEVG	AQFEFTETV	SQIGNLEAL	KQNEQMHAL	VKVGVNGFG
AIVEFATV	YTNGSFGS	KTFLFSATM	VQIKNDVFI	NQIYYYHNV	LESPIDPQS
SVYVYKVL	SQPGAYQP	TSLPYYTGV	IGPKNYEFL	AQVQLLHQL	TDEVVDYIS
TAYAFHFL	YSGSYNDY	VALDFEQEM	GQLLPQHYL	NMPDILHHL	LEAQAATGF
FQQEFPSL	DAAGVASL	SSYGQQSSF	LSLPNTDYI	EQQPQQHNL	GDFGDWSAF
VNAQFPRF	IQVSNVLS	ISYDYLTSL	AALLNTDLV	QQVQSLHSL	STNEENPVT
VAYVFQAL	TGNPTGTY	TAVEFSNQL	AALANATVI	ALSGIAAQL	RDQKLSELD
VFYQVQSL	AQYEDIAQ	VSLYLHDNT	DQIQNAQYL	SMTLAIHEI	DSAKKVLLE
RALNYTHL	SSWGGYVF	GSYNDFGNY	ISGVNRYYV	AIITGFRNV	PEAEQGGAE
SQYLFPKL	SVMPYLVA	FAVVFTARY	VGIENIHVM	AQLEKAHQL	NVEIDPEIQ
AVVELVTV	TDTTILQV	SNYQHITNF	AALLNQQFL	VNIDIIHRI	FGVGGLGGL
AQFEHTIL	LITGGTYA	TGLPYYTGV	TALENLSTL	LELEKVHDL	NYDSMKDFE
AAVKFHNL	MTEPIDEY	SGFDDPGIF	KALQFLEQV	VMNYVEHDL	SADTWNGVG
SAPSWPSL	YGGGNYGS	VAYKFPELL	SSSLNAEAI	TLLNVYHAF	NYGGGGGGY
EAYRFTGL	TGMGASLE	VSPASYENV	SALDNGPQI	KILDTFEKL	SFSNTPNSG
LVYKFMNL	WEEPSSGN	VIVRFLTVM	YAPDSIYYL	KQDACVHDL	GEEHVGFLK
ISYSFSVL	LATERKIK	SQYEFENYM	SKLANIDYL	KIDHILDAL	LPSPQHILG
SSITFVNV	APENAVRM	FSYSLGEAA	FAHIDGDHL	QQQQQQHLI	TQAPAVATT
ISPSYKTL	VVSVGQVF	ASYEFVQRL	GSIINISSI	KVLDVLHSL	SNFGGGGSY
VVYEFSTT	LSNGDHHF	VAPSFLNSV	AAVVNFEEA	KQNDVVRVL	AWEEPSSGN
ASFIFRQL	TLVTEAVQ		GSPMNTTQL	IVIGVLHQL	AGPSGPAGP
VNFKFGVL	TDTLINYM		KSLVNKGTL	DQARSIHNL	SASPAPPTT
YSLQFTNL	GNYGSGSY		VAPQNTTAL	SQQQYFHRL	TPEGVQAVN
SSPHYTTL	TPSGPPGP		KTVVNKDVF	ETIIIFHSL	EIAAKDKLS
SQYVFTEM	SSFYPELG		YQFALTTEI	SQNPTNHLL	DPDEKYLLR
YAMIYRNL	YSSPSIVL		TAVANNQAL	SLLPLPHHF	SQGVDWWGN
SVVNFTSL	SDGYGGNY		GSIVNEGYL	KLLAVIHEL	SSLHPMGGL
ANLIYYSL	THSSRFIP		AQLQNQQSF	TQDHVMHLL	EDNPQTLLF
SALVFTRL	PEAFPALA		ASLDNREEL	KQLEVVHTL	MPNENDKLN
VNIVHPKL	APAPPTVS		ASIENTSTL	QLLQALHHF	GGGGSYNDF
SALTFAGL	GVLPNIQA		SQLELKSLI	SALKTIHDL	TDAAVSFAK
SITSFPRL	QPFNVLYE		SLLTNHVTL	TLNDLIHNI	VELLGELEE
SSPPYLIL	EGLPEPIT		ESPINVTTV	GLSAVEHRL	LSSSLKRFD
VAFAFKKL	TGFKVGIN		VAAANREVL	QSLTVIHDF	KELGIETYK
AVYIHALL	KVIHDNFG		NMPWNVDTL	TQAGEIHDL	SGIGVSQVL
INYVVAHV	ALIPPLEE		IQLMNTAHL	ELLTELHQL	IALLSTGSK
KSITFSKL	VANKIGII		SSLVNKEDV	SALEVAHRL	VGVPKEIFQ
VGPKFRGV	DSAKKVLL		KSLKNFITI	TALQVFHNL	LLLPGPSVA
VILSFRSL	TGSESPIV		RSIQNAQFL	DQLQPLHTL	FGEEAEEEA
TIIVFHSL	MQVVPQET		VGLINKDSV	DMTVVEHQL	GGFGFGSSG
SFVELGQV	YVSPEQLS		YQGQNAWFL	AHNAVVHEL	VEQKVQSLQ
TTYRFPEL	AEGAGDAK		KSIVNQVFL	AQLKTMHNL	VSTGDVNVE
RNQVYTQL	TVVNKDVF		SSVLNVVSM	ALNPTQREV	VVAPLNIVL
LIYIFNTM	MMPTPVIL		VSLLDIDHL	ILNSNEHLL
SLVNADKL	GSGSYNDF		AMGTNDTVI	RQLAKIHAI
SSPEFSEL	LDHKFDLM		FQGSNGTVL	ALLPQNHKL
SNLQYSLL	FQGSTMLT		SLIILKQVM	VQTQIFHTL
AVLRYTKL	ASGPYGNF		NANTNTEVL	EILDISHNL
ISYLYNKL	EDLSSGLG		YSSENQEAI	ENIQLPHTL
VNFSPANL	FTIPLGTP		IQIANVTTL	SAIGYIHSL
TTLIFQKL	YSGSPTSY		KQLVNKEHL	QSHLVIHNL
NAPTFGSL	ETIPEEVG		FSITDQQTL	SQEELIHQL
AAYTFYAL	LLVPGTQG		FSLVNGDDM	EQDGILHTL
VSLQFAEL	LDVEHNLF		SAIIDSDNV	SQTPTEHVF
VNVRFTGV	TGPGILSM		SSPTNTTYV	QLSDTLHSL
VALLFRQL	STGGYNQP		WAVSNREML	SQLIDTHLL
VTVVFSTV	LLLPLGTG		AAPISPWTM	HQLPLPHNV
STFTFADL	ILNPDNSF		SQVYNDAHI	ESLRLNHEL
SNFNFALV	DAYEPEIS		AAIVDGDRI	AQLGLGHSY
INWIYSSL	YGGGGQYF		ASPEGQDYL	RLLPHMHNI
VQQLYTTL	AVAQGNLS		GSPENEEYI	ALNNLLHSL
VTTNPVEL	SLGYGQSN		NGVINAAFM	GLAPQIHDL
SAYRFSGV	VQLPAYLK		GVLVELEQA	SSNLELHSL
RDYVFIEF	TGTGAVSF		VSPTGGEVI	KQMLVPHGL
LALGLRSL	VEQSRLVA		FSFGNTSTL	VQHPLLHYL
AVPEFQGL	NSQTRIIE		AKLVNQEVL	VVMNVIHQL
AQFEHTLL	LSNVPLAF		KALINADEL	SQSQSLHQL
VNTIFTVV	TEDYDMFE		FHVQNIDLL	KMLAAIHTF
SALRFLNL	INNIIVGG		AALKLGQEL	SLLNAVHSF
VSPVYSYL	TAGQYPYP		SSPEGVETM	QQLQIIHRV
SIASFVTL	TSHLLRLA		AAIQNLSEA	KQIDVYRSV
ISLEFRNL	APINANAI		FSPLNPVRV	QLTQVIREL
IAPVFTAL	YNEGGNFG		AGIYNTTEL	QLLTVKHEL
ANINFPNL	TNEENPVT		LAPANTYTV	VINELIGNL
VNFEFPEF	YKFKQPQS		LSMRNTSVM	QQLPGHLGF
VAVQFADL	YDEIKKYT		RQILNADAM	NQLDGIHLL
QSIEFSRL	VSLRNLLG		AQVQNSEQL	KLTGIKHEL
INVELSLL	GVGDDQLG		LAIINPVEI	EQLNINHMI
IIQEFPAL	KLTGIKHE		AMGVNLTSM	EGLTTKHHL
VAPSFGTL	EDSLLPVM		STVVNADQI	SQLPVDHIL
EDFEVSSF	TEEGNPLL		TAIENATVA	RQQPIWHTL
VALNFQTL	SYPSASVE		ASNVTNKTD	NQQALSHSI
AAYEFTTL	SYSQPPYN		AAPINTQGL	RLLEEIHAM
ERPTYTNL	AQDDSILK		YVHVNRDTL	RLNQQAHQL
SGFVFTRL	AVLGTVTF		AGLENPITV	KIVELNTKL
STLLYGQL	GAGEMVNE		GAVFNGITL	NQVDSIHAL
SNFHFAVL	DHSGTLVM		SSPSNPAAL	EVSFVIHNL
ISLDYQHL	SYSFIARM		YAIVGLETI	ETLTEPHQL
TIVVFNGM	FVAATYKL		AAPTSAAAL	SQMGNLHAF
LQFQFAEV	TPYEPQPT		FMATNPEHL	QQNNVEHKV
GILTFSNL	YNGYGGGP		VQIANPAFI	HLNAVPHWI
HTYDFEKL	QGLPEPLT		SGLQNFEAL	VLNPTDHWL
TNLVYPAL	GSDSVILG		IQAENAEFM	SLLQTQHAL
HIYSFSSL	TWQQGYGP		SQLVKADEM	AMLAVLHTV
QLDVEHNL	GPVNHEEL		FSGSNAEQM	EMLEAPHQL
AAYGFRNI	ETLQITQS		WVLVNEKPL	TQLDVPHVI
RTYTYEKL	ENVPSSVT		SSTTNIDDL	KELQTLHNL
TAFKFKAL	YSSPSVVL		GGVVNMYHM	DQIEYHEGL
IDYQYQLL			KSVANLEYL	ELLYMAHDL
AAYSFYNI			ASIVNKDGL	SAILETHNL
SSYSFRHL			VTVLNVDHL	KALQLLHDI
TSLRFVFL			ISPQNMDIL	LLNQQVHSL
QALVFSNL			FALVNGNNI	ANLEVPHEL
KNIRYVAL			FSVLNWDQV	QLLTQEHVL
VNYLYGQL			SALANYIHL	KVISTAHSL
ASYEVAHL			IQPDNIVYV	NQNPGVRSL
VTPRFPKL			AALINRKEL	DQSQYIHHL
HGYTFANL			ASVLNVNHI	KLHDVEHVL
AWIHAAHV			IANINQELI	KRGIVGYDV
IWTIATNL			SGPINFTVF	GLMTTVHAI
SGYKFFSL			ISLKNSQEI	AQSFIAHNF
IAYIMPGL			FALVFTTRY	RLILEVHQF
STLIYRNM			QAPTSVTFL	SQLPLLSTI
VNVDYSKL			SGVSNPHVI	RLLQEAHDL
GSPRYAEV			SGPTNASAF	ITTEVVNEL
TAFRFSEL			NTHENLTYL	EGLPEIHHL
VNQKFNNL			KGVYNKSTI	SQLQAEHTL
SAYLYQSL			ASLVNADKL	AQLSPTHQI
FTSSFQGI			MAPQNLSTF	DSLEEIHAL
QSVAFTKL			GGPINPATA	SLQSIIHKF
KVIEFKKL			ISPVNPVAI	HQAQIDHYL
SMYVPGKL			AQIVNKHLI	KLLPEKHEI
VDYEYSEL			FAHTNIESL	QLNGLTHTL
SNLLYVNV			KAPVNTAEL	KTLELPHAF
ASPEYSNL			SGLLNSQAL	QQVQAAHSL
SVVAYNNL			SQGMNVTNM	GLLEIAHSL
LIYKFLNV			VTVVNSQTL	SVLEVSHVF
ASPEFTKL			YGNVNVATL	GQIKEYHTL
SNYSYPQV			LAGQATTAY	KANDLTHSL
QVVQFNRL			SAVKNDYEM	ILLNIEHRI
SSYKFNHL			KAPDNRETL	IQDVTLHDL
MNITYSNL			SGLLNPYSL	LLNPHLRQL
SAYEVIKL			ISGVNGTHI	DLLPQEHVL
QNYSYSSI			ASARNLEHL	RLAEVVHEL
PALLQSGL			SSLVNSQTL	TVIDVDHGI
QAYDFPAI			GAPLNLVDL	EMLKLGHEL
VAPLYKRL			SSLKNGVVL	LMNFHDHTL
ANYDFYQL			SSPQNQEQI	EMLHELHRL
TSLKLENL			SQIVNPESI	VLNKTYHDL
SSYQFGII			KTHINIVVI	ISIAVIHHF
VGFIYGYV			TQVLNTHYV	RQQLQAHQL
LTYTFSGL			SSPSNLQII	KVSDILHSL
VSFSYAGL			SALLLKDVL	TQLSSKHEL
VVDVFTQL			SAIINEDNL	EQLDTHMEL
VGIGFSNL			VSIQSESSL	ALLRDVHNL
VGLRYEKI			GSVVNSVAL	TLTNIIHNL
VAPEFRRL			HAIENIDTF	ELDKIIHEF
KNFVYRTL			SGLINHQRI	ESQSVIHNL
AQYQFSVL			IAVANAQEL	EFIEVFHEL
SGPPVKNV			AAMLNYTHI	RLDPYLHSL
VNFVHTNL			GAGYTFTQI	LQLVEFHQL
AVYTFETL			DALTNLTVL	SLLEHSREF
ATGPYPSM			AAPISTTEL	KVVSVLHHL
SDYVYPSL			VAPTNPQAV	TQVIEPHDI
SVVAFHNL			AMLTNLESL	NISGVIHAL
SGPTYIKL			ATIINEEVL	NVLRQLHEL
AGYMYTQL			WVLQTDSQQ	GQSSVNHNL
TEYVFTHL			LAPTNLSSS	EQSPLSHDL
KSFIYPSL			AAVENVSEL	SQLPQPHRV
STFSFQGL			ASHLNLDAL	AQAIHAHLL
IAPIYKKL			AAVIAHDFL	ELNSNFRQI
SNYRFEGL			VAPQSQELL	GANPAYHEL
INFDFPKL			VQLENQMVL	ALSEISHAL
KVIVFSQD			EAIQNSTSI	TLTNLIHNL
RAYLFAHV			VAPTSTVAV	TQLIQTHVL
TTYKYEMI			SSGINVNAA	SQTPVLREL
YQFVYQNL			GALKNTDYF	QATPLLHAL
QAYDFYYL			TSPVNPAVF	TQNGILHML
GQFQFTGI			LSVQNQDLI	TLLETGHDI
SSYPMASL			YSLGNTYTL	QALELAHVL
INLNYKDL			TQFINPETP	QLQEELHQL
HVYYFAHL			GGNINVETI	AMLTILHEI
TSYQFAAV			AALANLDNI	QLIPNDHSL
SAYLFTYV			AQLANTTAI	KLLGELHNL
QVALVHRL			SNLVNENTL	ALHTAIHTI
TTYKYFAL			SQVINPTAI	AQQNTGHFL
MSFQFAHL			YGLKNLTAL	KILPNYHHL
RIYQFTAA			NSVINVSNL	QQQQQLHSL
ISVRFHNL			VAPYNTTQF	AMSSQLHSL
LGYKYVGM			SGPLDSTFI	EQQWVSHTF
VIHIFSHI			YSGIPAVSF	DLNHQAHNL
VSPEFHTL			GGIQNVGHI	SSLEAEHRL
IVYKWVNV			AQIINSTAL	EQLHGSHEL
AQYSFDKL			YGQSNYSYP	QLNVVIHQL
LLGELHNL			VSPANAAQI	EELPHIHAF
SGYTFSAV			TMAYNITPL	TLVTIKHEL
SGLKYVNV			VAPLNLGMI	GMLDTHHKL
SGFSFGTV			YTATNQDFI	RYQPEQPNL
VIFIFTKV			NQGTNVETI	SQDGVQHLL
VITKFINV			SSLINGSFL	VQLPGLHEF
RTFEFKSL			NSIRNLDTI	SAIGYLHSL
ISVQFNQL			ASVLNVTAL	QQASDVHEL
AQQMYQSL			SSVQNGIML	AQLAEYHKL
VWIQVSRL			SQLLNLTQL	SQLPGTHEI
AGVKFTGL			TSIKNQTQL	VLLTHYHSL
VAHLYSNL			AAIENIEHL	QSNDTFHSF
SSMAYPNL			PVVFETEKL	TLIVEPHVI
QALIYAEM			VALLNLENM	VLTQQYHQL
SSIVFAEL			AGPENSSKI
ISLEYSEL			AAMLLQQVM
TNVDFPSL			YQYTNSEVL
ALVRFVNL			SGPTSLFAV
RAIAFQHL			ASMTNRELM
AYFTHSNL			IQPINHTTL
VQYVLPRL			SSVLNLTEL
SSFAFAGL			ATVENLNEL
PYTEFPEF			IGIENIHYL
KNLRYQLL			SAPSADAPM
SIANFTNV			SGLSGHTTL
RSPKFSSL			SSSTNVDLL
KIIEFANI			LSPANGEQI
VAPRYHLL			SGIIDSDFL
ESVEFQNL			FGVLNVQTV
IGFGYPAY			SGGVNLQSM
VINSFVHV			SAPENAVRM
KAFTYINL			SAMENLNEM
SIVSYNHL			SALTNHQRI
SISASSGL			SAPDNVLEV
ADFELHNF			IGLQNGVLL
SSAQFLGL			TGVVNAQAL
KVYNYNHL			AAIANHQVL
ILIVYENL			AQSINITEL
IIITFNDL			ASLSNLHSL
VTFIYQKL			FSEENHEPL
SGPVLPSL			FSPTNPAHL
ESLVYTTL			FSQENTEKI
AALIYTSV			FSSTNPTQV
NNYVYAGL			FSVEGQENL
VNFTYQFL			GGPENVAEM
VNRSFIAL			GMIENGPFL
PTEEESPV			GSLKNVTTL
VAYTYDNL			ISPENHISL
LAPTFSNL			ISPTNPTKL
YVLVYYNL			IVGINLTEM
AQFNFQNV			KSVINTTLV
VTYLFVQL			LSAKNKDYM
SGYDFGYL			LSGVAVVVL
ASYPFTTL			LSPINHNTL
SGYYFTTL			LSVRNGATL
TNYKFFML			MSMTNATFI
VIFEMTNL			NGPQNIYNL
GVYVFGEL			RSIKNVTEL
SHPREPTL			SAALNKDFL
VQYKFSHL			SALEFLTHL
IVDPVSNL			SSGINGSFL
VNIEFKDL			SSLENATSL
AGPGFINV			SSPENKNWL
ATFQFSNL			SSPSNKFFF
SFSSFYNV			SSPTSTEYI
AAFVFRKL			STPVNVTSL
VSPYFVAL			STVENFSQL
TQFLYPKV			STVRNADVI
FGYEYITV			STVSNMATV
VTFDYEEL			TAVVNVTYM
TQQLYPSL			TGPSNVDKL
YSLVYQAL			TSAQNVEFL
VTWRVTNL			TSFVNFTDI
ISFEYSTI			TSTTNPEFV
VNNEFEKL			TSVENHEFL
VVYIYHSL			TTVTNPEPM
TQYIFNNM			TTVTNSTPL
FNVHSAVL			VALRNLEQI
KNVLFSHL			VAPFLRQEF
AVLKYYKV			VAPSSVVEL
SGHNLEYL			VAVENTTSL
VGYRYETL			VCVDNSEYM
VAFAYKNV			VDVTNTTFL
SGYKYVGM			VSPANSTTL
SSLEFSQI			VSPLNVTAV
PALIYSST			VSPTNPTKL
VSFPTQVL			VSVANVDLL
AVYAFLGL			VTIQNSELM
SGYKFGVL			VTLENYTHL
LAPAYALL			YAVGNHDFI
SNIHYHTL			YTVANKEYV
SVYGFTGA
ESPSYRTL
VSIQFYHL
SWIAVSAL
SHYEFHNI
TSFRYSSL
SVLPYEYT
VVPEYVTL
SGYSFTHI
SAYEYLEL
STFEFHSI
VSVVFVNL
SSFVFLNL
ETPVYANL
ITYTYDLM
RVLLFSQM
QVFIFTGL
VAPHHLFL
QNYNFSNM
STVEFTNL
VAPEYQLV
NSFRYNGL
NTYIYSGM
SIYEASSL
SGPQFVQL
SSYTFEQL
VFRLLPQL
SNMTYEKL
EAPEFIEM
SSPYFAAL
TSMYFSAV
TNYRFKNL
TSVVFNKL
VVVMFTAL
SVISVVSY
KSIDFPLT
LSYQYSGL
SSPVYIDL
ISPLFAEL
SSPAYPSL
VAPSAVNL
TALMFAAL
ATQVYPKL
TAYRPPAL
TSIAFKNI
EDFDIHEL
GTYDYTQL
SGYDFGYM
SQFKYALV
ANVVFTQL
IAYEYSEL
VSYKYSKV
IIYPPPEV
ISYQFSNL
ESPLFNNV
SAMVFSAM
VGITYQHI
INDPFIDL
TNVTFSKV
SSQQFSGI
AQFKFTVL
SSVRFSYM
KGFYFAKL
TSYFTSGL
SNPEFSSV
SILQYSNV
TNLIYQQV
KVFEYHNV
IIVSFVNA
AILSFTSL
RVLIFSQM
STYKFFEV
GVLRFVNL
IVPLFTNL
YAYAPSSL
SVLNVNHI
IIPTFANL
KNVTFEHV
INYSYINL
IFYYVQKL
TNYTFENV
RQYMFSSL
VVYSYHYL
SSYDFTSI
AAYAYSAL
SSFVFSTV
RNFIFSRL
SGYDYSYA
YQYSFPEL
RIYGFTAV
ASYLLAAL
TIYRFLKL
IMYNVTEL
ASYVYLSM
INTAYTNV
LMEHIHKL
KVLHFYNV
ASYLFRGL
VSYIFTYA
STFQYGPA
SALIYSNL
KIYYFAAV
KVLVFSQM
SSLLFTQI
VVAVFVGV
IITGFRNV
TTVAFTQV
SSYIYGYV
AVLSSGGL
ANYNFRGM
RAPQFINL
VWLEAARL
MSYLFRNI
TSPHYQNL
IIYNPKNL
EDFYYTEM
SAYLFVKL
TNVQYSNL
SSYAYTLM
RGPTYVNM
LNYTYSQL
ENYSFEEL
SVYTHSYL
GSYSYTQV
SGLVFVQV
SGLNYKKL
EDLKLTEL
VITKFDHL
IISTFQNL
AVLNFTAL
KSLEYHHL
SQYRFEHL
VNYISAVL
NGYSFINI
EIVSFQHL
SSYTFPKM
SAVIFRTL
STYLFRLM
AFYTVAHL
IAPAFSSM
AWIKVEQL
IGPYYRKL
AIFNFQSL
IAYGYNNI
SAPTFINF
QTYDYRNI
RAFEFKSL
ATYTFSGL
ATLVFHNL
SNLKYSLL
STFVYNSM
ATYIFNGL
AQYNFILV
TFFTPGNL
SSGDFPSL
TWLVVTTL
SVIKFENL
RQYIFSKL
SAPIYKRI
TNVEYAHL
VAYEAPSL
SGYIYHKL
IAYEFVEM
YSYSFFHL
TSYRFLAL
TIYKFQGM
SVLYKENL
IAVSFREL
VNLAYENV
EQYKFYSV
VNYEPLGL
AQYKFIYV
ATFSFESL
TGYQYPTM
SSYVHSNL
SNYLHRVV
EVFDFRGM
ALLSFTSL
SGIDFKQL
TTPVYVAL
IIKDIHNL
AVYTYLRL
AAYSFYNV
INFDFNTI
VGVTYRTL
TSPEFTSV
SGYQYKRL
SVINVSNL
RNLDYARL
KVITFIDL
IAYQFLRA
SSLEFTEL
SSLYFKNI
SSPKFSEI
NTYKYAKI
VVFQFQHI
KILVFVAV
KVYLYTHL
VSGIFPGL
EIITFTAM
AIVSFAHV
ISTSFPNL
IIYTFPVL
SIVQFYYM
KNYDFAQV
KVLHFFNV
LVYQFKEM
EIISFQHL
KVYTFNSV
SSYSPQSL
SALQATEL
SSLGFERL
VAYKFPEL
RSLKFYSL
ASFLYAEI
SIALYSDI
ELQTLHNL
TIIIFHSL
VSPLFQKL
VWLDAAAL
KVVKFSYM
RIFQFQNF
SALRFQAM
AALQYRGL
GLAHLHSL
TNISFTNM
ITTEVVNE
AIIAFKTL
VIAELVNV
ATFEYSFI
TVIIYVRL
TITDFINI
VNVRFSTI
AVLRFESV
TSPEFQEM
VIQVFQQL
ALYQFSNL
VTLLYSQL
IAVQFVDM
SSFEYGQV
ISPDYRNM
TIILFTKV
SNFTFSHL
TAINFSTV
RNYQFDFL
SLIIYSTV
VSYQHAFL
SSYIFSLV
SIVSVTAY
SLLQPLNV
IGLDYSSL
SFLDVRNI
AVVDFEAL
SAFDFENM
VIATFSLL
EDFLYSGF
SGFSYPNF
SGYGSHGY
YNLDYTEL
QLEVVHTL
PHQPIENL
VIVDANNL
SMVDVVML
SSLLFVKL
TNSASSTL
VIVRFLTV
LIGVDHSL
IRTLYLTL
VNYPFIDM
RSYDFEFM
SAPEYVFL
MAYMASKE
VAVVNVHS
VAYGFRNI
VGPVYPIL
ASPVFARL
VSVSALTL
PALIYSSA
IFEFKETL
GIENIHYL
AIRNDEEL
SITSFIPR
RVYFNKGL
SVVGFVEL
SILLYSTV
VRNPQQHL
SYEFVQRL
QSPSANVL
SISVQVNS
SVDMKIGV
SVPVMTQP
