# Supplementary material
Source: HighWire-hosted journal article supplement (https://jitc.bmj.com/content/13/4/e010673)
Supplement: inline-supplementary-material-9 [file inline-supplementary-material-9.xlsx]

## Sheet: s7 - pie - nonamer H2Db - 5TGM1
	%	Number of peptides
SB	96.1995	405
WB	1.18765	5
NB	2.61283	11
